# Supplementary material
Source: PubMed Central journal article supplement (PMC5818986)
Supplement: NIHMS934641-supplement-Supplemental_Info.pdf [file NIHMS934641-supplement-Supplemental_Info.pdf]

# Library design-facilitated high-throughput sequencing of synthetic peptide libraries

Alexander A. Vinogradov, Zachary P. Gates, Chi Zhang, Anthony J. Quartararo, Kathryn H. Halloran, Bradley L. Pentelute

Department of Chemistry, Massachusetts Institute of Technology, 18-596, 77 Massachusetts Avenue, Cambridge, Massachusetts, 02139, United States.

## Supporting Information

### Contents

|                                                                                                  |    |
|--------------------------------------------------------------------------------------------------|----|
| 1. General.....                                                                                  | 2  |
| 2. Methods .....                                                                                 | 2  |
| 2.1. Solid phase peptide synthesis.....                                                          | 2  |
| 2.2. Library synthesis .....                                                                     | 3  |
| 2.3. Synthesis of authentic peptides for sequencing validation.....                              | 4  |
| 2.4. Library cleavage and nano-LC/MSMS analysis .....                                            | 8  |
| 2.4.1. PAM ester saponification.....                                                             | 8  |
| 2.4.2. nano-LC/MSMS analysis of library bead mixtures.....                                       | 8  |
| 2.4.4. Post- <i>de novo</i> data analysis .....                                                  | 9  |
| 3. Experimental data .....                                                                       | 10 |
| 3.1. Analysis of a library 1 sample containing 306 beads.....                                    | 10 |
| 3.2. Matching fragmentation spectra from library and authentic peptides.....                     | 11 |
| 3.3. Construction of alternating monomer sets .....                                              | 15 |
| 3.4. Amino acid frequency distribution $\chi^2$ -test for the sample of 660 library 1 beads..... | 16 |
| 3.5. Peptide separation on nano-LC .....                                                         | 17 |
| Appendix I. Sequences identified from the 660 bead sample .....                                  | 20 |
| Appendix II. Sequences identified from the 306 bead sample.....                                  | 35 |

# 1. General

Aza-1H-benzotriazole-1-yl)-1,1,3,3-tetramethyluronium hexafluorophosphate (HATU) and proteogenic N<sup>α</sup>-Fmoc protected D-amino acids were purchased from Creosalus Inc. (KE). (1R,2R)-Fmoc-2-amino-1-cyclopentane carboxylic acid (Acp), (1R,2R)-Fmoc-2-amino-1-cyclohexane carboxylic acid (Ach), Fmoc- $\alpha$ -D-aminobutyric acid (Abu), Fmoc- $\beta$ -alanine ( $\beta$ ), Fmoc- $\delta$ -aminovaleric acid (Ava), Fmoc-D-cyclohexylalanine (Cya), Fmoc-D-4-fluorophenylalanine (Fph), Fmoc-D-4-aminophenylalanine (Aph), Fmoc-D-naphthylalanine (Nap), Fmoc-D-perfluorophenylalanine (Pfp), Fmoc-D-4-phenyl-phenylalanine (Phf), and Fmoc-D-3,4-dichlorophenylalanine (Cph) were from Chem-Impex International (Wood Dale, IL). <sup>α</sup>N-Boc-Glycyl ester of (4-hydroxymethyl)phenylacetic acid was purchased from PolyPeptide Group (Strasbourg, France). 30  $\mu$ m monosized Tentagel S NH<sub>2</sub> resin was purchased from Rapp Polymere (Tuebingen, Germany).

N,N-Dimethylformamide (DMF), dichloromethane (DCM), diethyl ether, and HPLC-grade acetonitrile were from EMD Millipore. Triisopropyl silane (TIPS), and 1,2-Ethanedithiol (EDT) were from Alfa Aesar. Solvents for HPLC-MS were purchased from Fluka. All other reagents were purchased from Sigma-Aldrich.

All reagents were used as received.

Proteogenic amino acid residue encodings are reserved for corresponding D-amino acids throughout the manuscript. In other words, libraries were synthesized from D-amino acids where applicable.

## 2. Methods

### 2.1. Solid phase peptide synthesis

Individual peptides and peptide libraries were synthesized using established batch Fmoc SPPS techniques. Briefly, Fmoc-protected amino acids were dissolved in appropriate volume of 0.38 M HATU in DMF, and activated with 3 eq. of DIEA. Couplings were allowed to proceed for 10 to 30 minutes at room temperature with periodical gentle rocking of the resin suspension. <sup>α</sup>N-Fmoc protecting group removal was achieved by two 3 min treatments with 20% (v/v) piperidine in

DMF. Side chain protection was as follows: Asn(Trt), Asp(OtBu), Cys(Trt), Gln(Trt), Glu(OtBu), His(Trt), Lys(Boc), Ser(tBu), Thr(tBu), Trp(Boc), Tyr(tBu).

## 2.2. Library synthesis

Library 1 was synthesized by manual split-pool Fmoc SPPS (section 2.1). Fully assembled library 1 contained peptide ss1-ss2-ss1-ss2-ss1-ss2-ss1-ss2-ss1-βCKQDSDCLAGSVCG-PNGFCG-CONH-Tentagel at 0.02 mmol/g loading, and ss1-ss2-ss1-ss2-ss1-ss2-ss1-ss2-ss1-Gly-PAM-CONH-Tentagel at 0.18 mmol/g. ss1 was any amino acid of the following set: Asp, Phe, His, Lys, Met, Pro, Trp, Leu. Analogously, ss2 was Ala, Glu, Gly, Gln, Ser, Thr, Val, Tyr.

Ile was excluded from the library design due to the fact that it is difficult to differentiate it from isomeric Leu without additional experimental manipulations. Cys was not used to avoid any potential complications associated with on-resin oxidation of displayed peptides. Asn was excluded due to the fact that it consistently underwent near quantitative deamidation to Asp during the PAM saponification step. Arg was not used because we found that peptides containing an internal Arg residue tend to yield CID fragmentation spectra of poor quality.

6 grams of resin (Tentagel S-NH<sub>2</sub> 30 μm resin from Rapp Polymere, 0.20 mmol/g amine loading) was first coupled to 4.5 mmol of Boc-Gly-PAM-OH and 0.5 mmol of Fmoc-Gly-OH to achieve dual functionalization of the resin (Scheme S1). Then Boc group was removed by treating with trifluoroacetic acid (TFA, twice, each with 40 mL for 2 minutes). The resin was washed with DMF (3 times, 50 mL each) and DCM (3 times, 50 mL each). 20 mL of 0.4 M Alloc-OSu in dry DCM and 3 mL of DIEA was added to the resin to functionalize the unmasked H<sub>2</sub>N-Gly-PAM with Alloc protection group. After removal of the Fmoc group (two 3 minute treatments with 20% (v/v) piperidine in DMF), the constant region (βCKQDSDCLAGSVCGPNGFCG) was assembled following standard Fmoc protocols (section 2.1). Then, Alloc protection on Gly-PAM was removed with 400 mg of Pd(PPh<sub>3</sub>)<sub>4</sub> and 8 mL of phenylsilane in 32 mL of dry DCM for 20 minutes at room temperature, and split-pool Fmoc SPPS ensued. Fully assembled library was deprotected with 2.5% (v/v) EDT, 2.5% (v/v) H<sub>2</sub>O, and 1% (v/v) TIPS in TFA for 2 hours at room temperature. Deprotected library was washed with TFA, DCM, diethyl ether (five times each) and dried under reduced pressure.



in TFA for 15 minutes on ice. Peptide carboxylates obtained in this way were analyzed on Agilent 6550 iFunnel Q-TOF LC-MS coupled to Agilent 1290 Infinity HPLC system equipped with Phenomenex Jupiter C4 column (150 x 1.0 mm ID, 5  $\mu\text{m}$  300 $\text{\AA}$  silica). The analysis method was as follows. At 40  $^{\circ}\text{C}$  and a flow rate of 0.1 mL/min, the following gradient was used: 1% acetonitrile with 0.1% formic acid added (FA, solvent B) in water with 0.1% FA (solvent A) for 5 min, 1-51% B in A ramping linearly over 25 min, and then 51-70% B in A ramping linearly over 5 minutes. 10–20 ng/ $\mu\text{L}$  peptide solutions were subject to analysis. All chromatograms below are plots of total ion current (TIC) versus time.

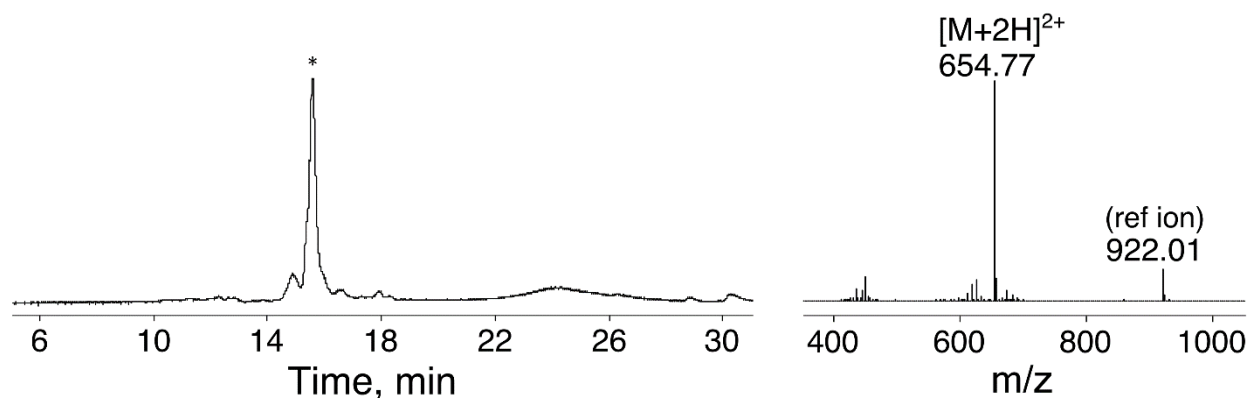

**Figure S1.** HPLC-MS (TIC) chromatogram for the crude  $\text{H}_2\text{N}-\text{GC}\beta\text{FADASEFPHG}-\text{COOH}$  on the left with a mass spectrum of major peak (labeled with an asterisk) on the right. Calc. monoisotopic mass = 1307.51 Da, Observed mass = 1307.53 Da.

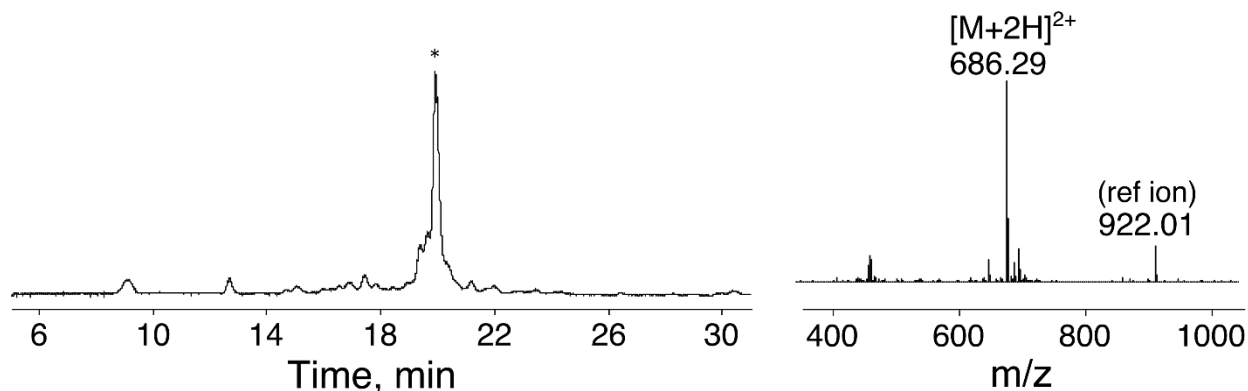

**Figure S2.** HPLC-MS (TIC) chromatogram for the crude  $\text{H}_2\text{N}-\text{GC}\beta\text{FLDEGYGPWG}-\text{COOH}$  on the left with a mass spectrum of major peak (labeled with an asterisk) on the right. Calc. monoisotopic mass = 1370.55 Da, Observed mass = 1370.57Da.

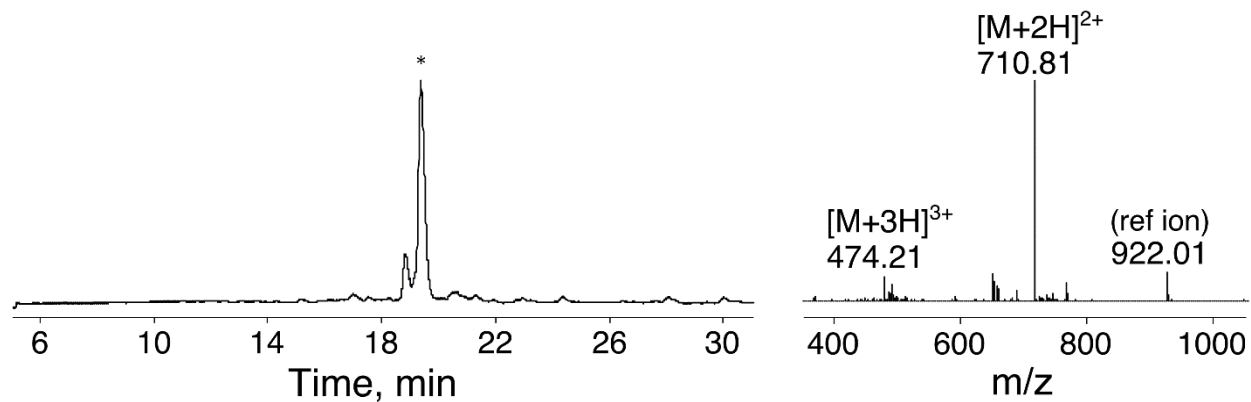

**Figure S3.** HPLC-MS (TIC) chromatogram for the crude H<sub>2</sub>N- GCβFLDEVEFPHG-COOH on the left with a mass spectrum of major peak (labeled with an asterisk) on the right. Calc. monoisotopic mass = 1419.60 Da, Observed mass = 1419.61 Da.

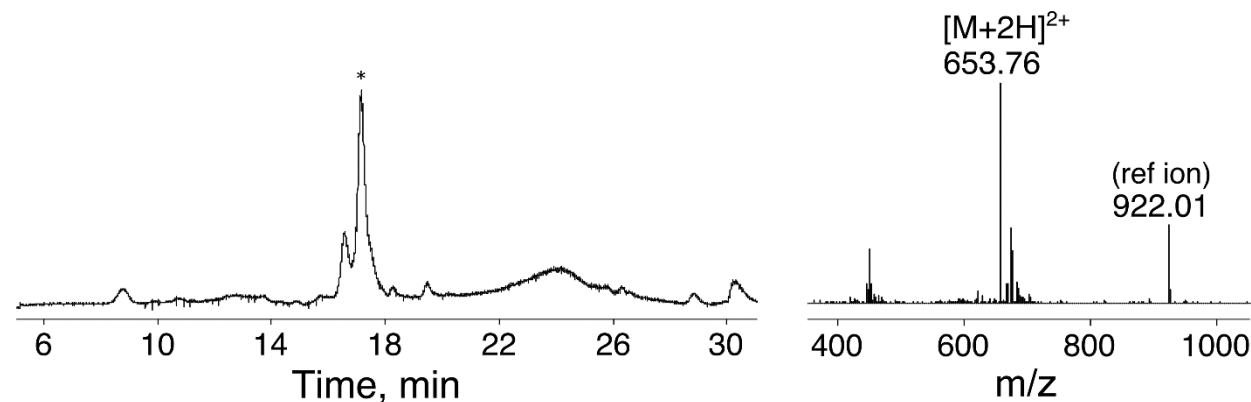

**Figure S4.** HPLC-MS (TIC) chromatogram for the crude H<sub>2</sub>N- GCβWADESAGPWG-COOH on the left with a mass spectrum of major peak (labeled with an asterisk) on the right. Calc. monoisotopic mass = 1305.50 Da, Observed mass = 1305.51 Da.

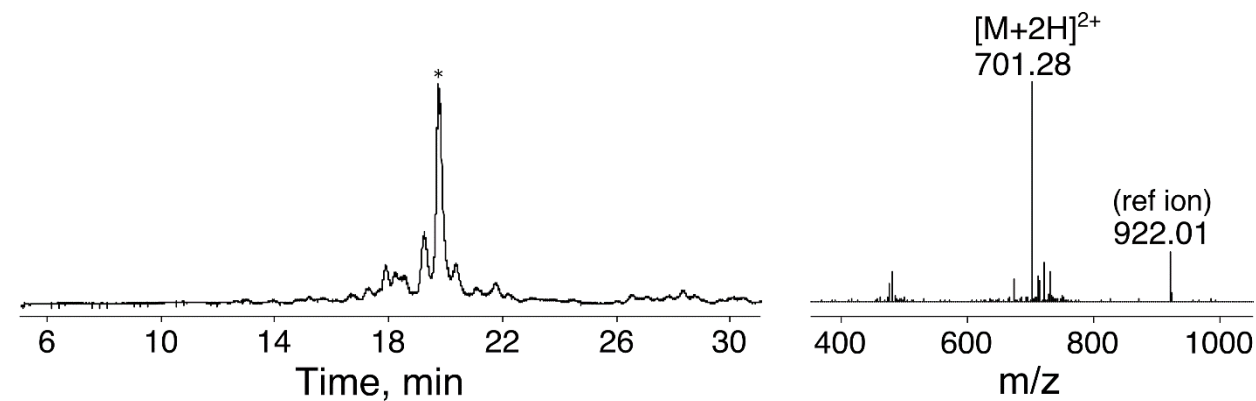

**Figure S5.** HPLC-MS (TIC) chromatogram for the crude H<sub>2</sub>N- GCβWLDEDTFMGG-COOH on the left with a mass spectrum of major peak (labeled with an asterisk) on the right. Calc. monoisotopic mass = 1400.53 Da, Observed mass = 1400.54 Da.

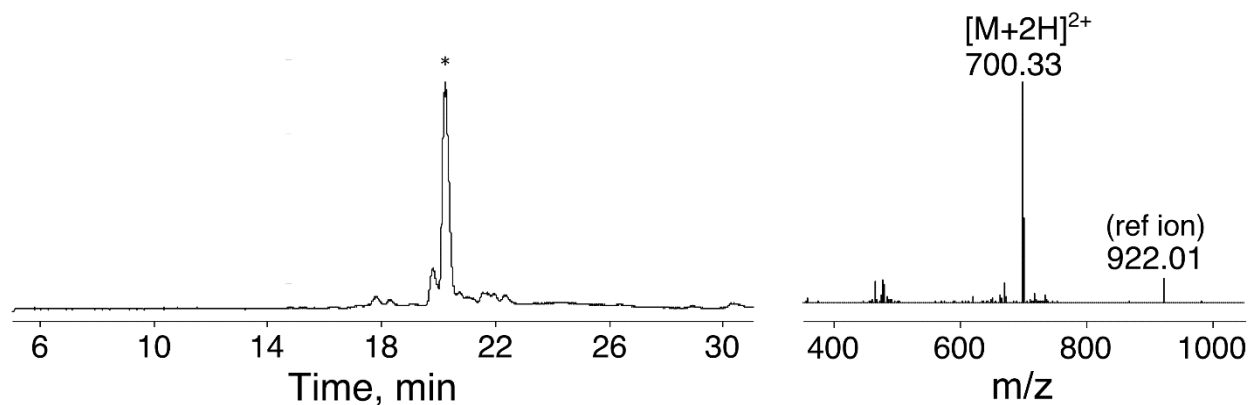

**Figure S6.** HPLC-MS (TIC) chromatogram for the crude H<sub>2</sub>N- GCβWLDPSLFPHG-COOH on the left with a mass spectrum of major peak (labeled with an asterisk) on the right. Calc. monoisotopic mass = 1398.63 Da, Observed mass = 1398.64 Da.

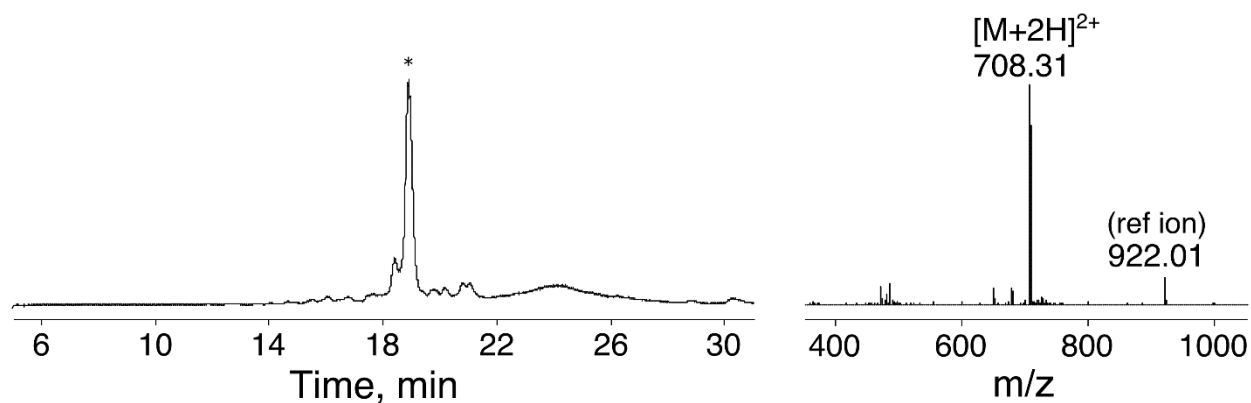

**Figure S7.** HPLC-MS (TIC) chromatogram for the crude H<sub>2</sub>N- GCβWLDTDPFPHG-COOH on the left with a mass spectrum of major peak (labeled with an asterisk) on the right. Calc. monoisotopic mass = 1414.59 Da, Observed mass = 1414.61 Da.

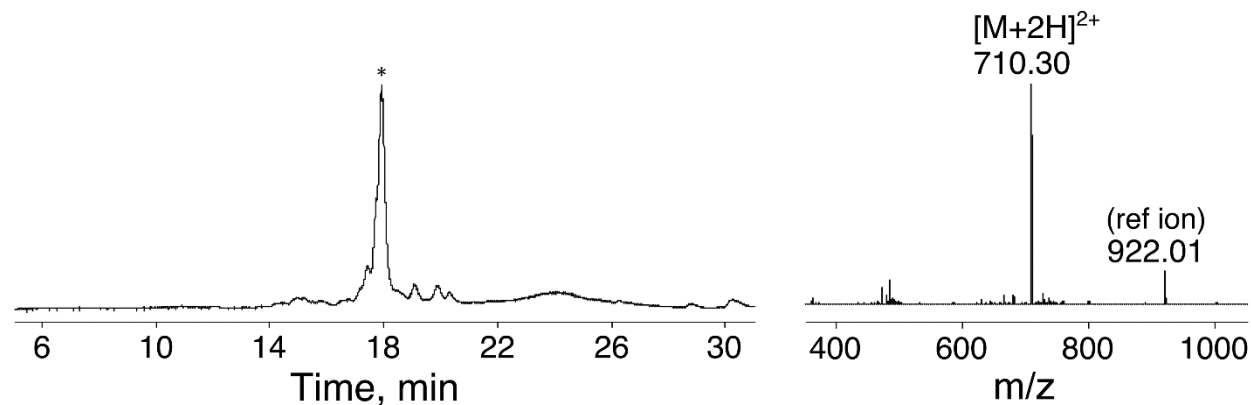

**Figure S8.** HPLC-MS (TIC) chromatogram for the crude H<sub>2</sub>N- GCβWLDTSEFPHG-COOH on the left with a mass spectrum of major peak (labeled with an asterisk) on the right. Calc. monoisotopic mass = 1418.58 Da, Observed mass = 1418.59 Da.

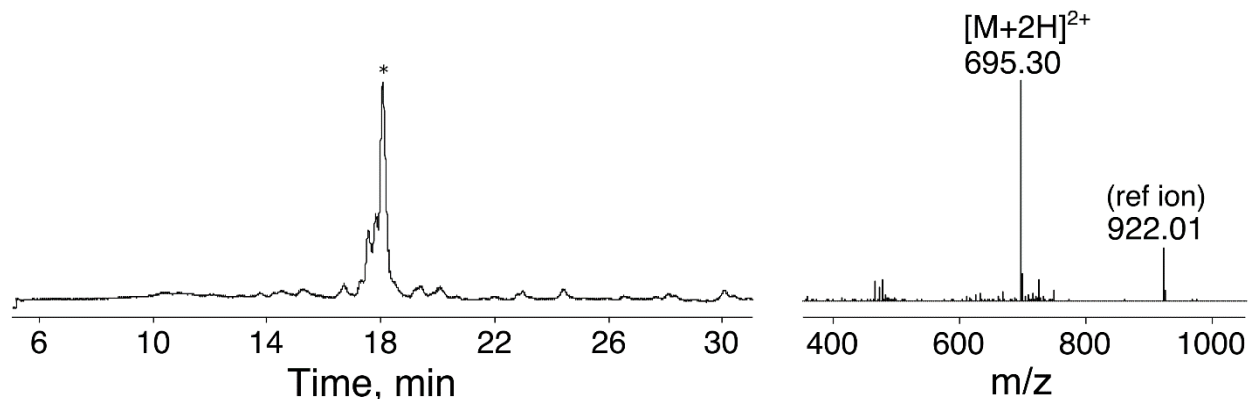

**Figure S9.** HPLC-MS (TIC) chromatogram for the crude H<sub>2</sub>N- GCβWLSADEFPHG-COOH on the left with a mass spectrum of major peak (labeled with an asterisk) on the right. Calc. monoisotopic mass = 1388.57 Da, Observed mass = 1388.59 Da.

## 2.4. Library cleavage and nano-LC/MSMS analysis

### 2.4.1. PAM ester saponification

A deprotected, dried peptidyl resin bearing library peptides was suspended in water and sonicated until homogeneity. 2 µl aliquots containing 50-2000 beads were taken for analysis. The number of beads in each sample was counted manually under a bright-field microscope for samples containing less than 1000 beads or estimated for more complex suspensions. PAM ester saponification was carried out by adding 4 µl of 1M NaOH in water to the peptidyl resin suspensions. The cleavage reaction was allowed to proceed for 45 minutes at room temperature, after which it was quenched with 40 µl of 1% (v/v) TFA in water. The beads were spun down (1 min at 14000 rpm), and the supernatant was carried forward for nano-LC analysis.

### 2.4.2. nano-LC/MSMS analysis of library bead mixtures

Nano-LC/MSMS analysis was performed on Thermo Fisher Orbitrap Fusion Lumos Tribrid Mass Spectrometer coupled to Thermo Fisher EASY-nLC 1200 System equipped with Acclaim PepMap RSLC C18 column (250 mm x 75 µm ID, 2 µm 100Å silica). The standard nano-LC method was run at 40 °C and a flow rate of 300 nL/min with the following gradient: 1% of 80% acetonitrile in water with 0.1% formic acid added (solvent B') in water containing 2% methanol and 0.1% FA (solvent A') ramping linearly to 5% B' in A' over 2 minutes, followed by 5-61% B' in A' ramping linearly over 68 minutes, followed by 61-99% B' in A' ramping linearly over 5 minutes and finally 99% B' in A' for 5 minutes. MSMS acquisition over the course of the method duration was performed in a data-dependent style (Top N=15, z=2-10, intensity threshold = 10<sup>5</sup>) with a dynamic precursor exclusion for 20 seconds after each scan. CID and HCD fragmentation



spectra were acquired for every selected precursor ion. Orbitrap was used as a detection method for both primary (resolution=120000) and secondary (resolution=30000) mass spectra.

#### 2.4.3. *De novo* peptide sequencing in PEAKS

*De novo* peptide sequencing was performed in PEAKS 7 or PEAKS 8 from Bioinformatics Solutions Inc. (ON, Canada). Sequencing data obtained as described in the section above was refined as follows. HCD and CID scans were merged within a 0.2 minute and 10 ppm window, mass precursor correction was performed, and primary mass filtration was performed as appropriate. *De novo* sequencing was performed allowing 15 ppm assignment errors and 0.05 Da individual fragment mass errors. For library 1 methionine oxide was selected as a variable PTM. For library 2, 2-aminobutanoic acid was sequenced as a variable PTM on Gly, while Acp, Ach, Cha, Fph, Aph, Nap, Pfp, Phf and Cph were sequenced as fixed PTMs on unused Pro, Cys, Thr, Met, Leu, Asn, Glu, Trp and His, respectively. 15 candidate sequences were obtained for each preprocessed scan.

#### 2.4.4. Post-*de novo* data analysis

After performing *de novo* sequencing as specified above, the list of all peptide candidates and a single top candidate peptide lists were exported as .csv files and further analyzed in Python 2.7.10. A number of open source libraries were used for parsing data and analyzing the outcomes: namely, Numpy (Stéfan van der Walt, S. Chris Colbert and Gaël Varoquaux, *Computing in Science & Engineering*, 13, 22-30, 2011), Pandas (Wes McKinney, *Proceedings of the 9th Python in Science Conference*, 51-56, 2010), Scipy (<http://www.scipy.org/>) and matplotlib (John D. Hunter, *Computing in Science & Engineering*, 9, 90-95, 2007).

First, working with a list of all peptide candidates, sequences not matching library design rules (sequence length, C-terminal Gly, correct monomers in every position) were eliminated from further consideration. Next, for scans with multiple remaining sequence candidates, a single peptide with highest ALC score per scan was retained, while the rest were excluded. After this, remaining sequences were labeled as “unique” and “non-unique” based on a number of criteria. Comparing peptides to each other, a number of attributes, including retention time difference, measured mass difference, and sequence distance (Hamming distance) were considered, and if peptides were found to be similar to each other, the one with lower ALC score was labeled as “non-unique”. Finally, the list of unique sequences was refined further by a) identifying pairs of

peptides with Hamming distance=1 and a Q/E mismatch, and eliminating sequences bearing “E” in the mismatched position; b) identifying pairs of H<sup>+</sup>/Na<sup>+</sup> sequences and removing Na<sup>+</sup>-derived ones; c) removing Met-oxide containing sequences if unoxidized ones were also present; d) identifying pairs of peptides with Hamming distance=1 and a Q/A or E/A mismatch, and eliminating sequences bearing “A” in the mismatched position (unidentified, fairly prominent side reaction). The list of remaining sequences was considered to be the end result of library decoding.

Technically, even for sparse libraries analyzed in this work, there is a non-zero probability that at least two beads in the sample will bear identical sequences: a fact that undermines the assumption that the number of sequences present in the sample equals to the number of beads. If this is the case, the workflow outlined above becomes less efficient, and would require additional modifications that were not explored. The probability that in a set of  $n$  randomly chosen beads from a greater pool that may contain as many as  $d$  sequences *at least two* beads will bear the same sequence can be estimated using the “birthday paradox” approximation. If  $n \ll d$ , the following formula is a good estimate for the resulting probability:  $p(n, d) = 1 - e^{-\frac{n^2}{2d}}$ . With  $n = 660$  and  $d = 1.34 \cdot 10^8$  (theoretical diversity of library 1) this probability is  $\sim 0.0016$ . We considered this value to be low enough to disregard the possibility of duplicate sequences in our samples.

## 3. Experimental data

### 3.1. Analysis of a library 1 sample containing 306 beads

A sample containing 306 beads from library 1 was analyzed in a manner described in section 2.4. Additional data analysis was performed following the procedure for a 660 bead sample outlined in the main text and is summarized in Figure S10. Results of this analysis corroborate those obtained for the 660 bead sample. The full sequence table containing identified peptides is provided in Appendix II.

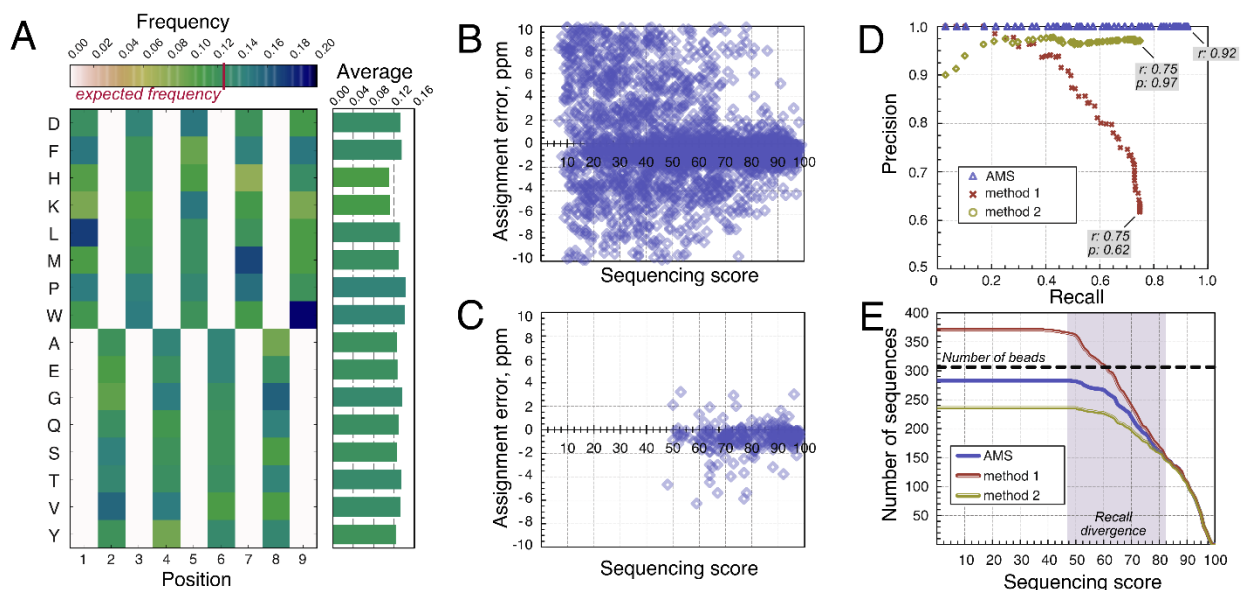

**Figure S10.** Evaluation of the role of AMS in increasing the confidence in sequencing results. All data are from the 306-bead sample (283 unique sequences identified). A) Color-coded positional amino acid frequency is shown on the left, and the mean amino acid frequencies are plotted on the right. Each non-zero cell in the matrix has the expected value of 0.125, and the observed values map close to it. B) Sequencing quality scatterplot for the unfiltered PEAKS output. C) Sequencing quality scatterplot for the final filtered data set. Most peptides with low sequencing score and/or large assignment errors are removed during post-processing. D) Precision-recall curves for different data filtration methods. Method 1 is inferior to AMS in both precision and recall. E) Total number of sequences recovered as a function of sequencing score for different data filtration methods. Results diverge in the region of medium (45-85) sequencing scores.

### 3.2. Matching fragmentation spectra from library and authentic peptides

For the experiments described below, a corresponding library was analyzed as described in section 2.4, except MSMS conditions differed in the following way. Agilent 6550 iFunnel Q-TOF LC-MS coupled to Agilent 1290 Infinity HPLC system equipped with Phenomenex Jupiter C4 column (150 x 1.0 mm ID, 5  $\mu\text{m}$  300 $\text{\AA}$  silica) was used to perform the analysis. The HPLC was performed at 40°C and a flow rate of 0.1 mL/min with the following gradient: 1% acetonitrile with 0.1% formic acid added (FA, solvent B) in water with 0.1% FA (solvent A) for 5 min, 1-41% B in A ramping linearly over 65 min, and then 70% B in A for 7 minutes. The entirety of the sample was analyzed. MSMS acquisition over the course of the method duration was performed in a data-dependent style (Top N=10, z=2-10, intensity threshold = 7500) with a dynamic precursor exclusion for 30 seconds after each scan. CID fragmentation spectra at two different collision energies were acquired for every selected precursor ion. Authentic peptides were analyzed in an analogous fashion. Appropriate raw CID spectra were manually overlaid and are demonstrated in Fig. S11-17.

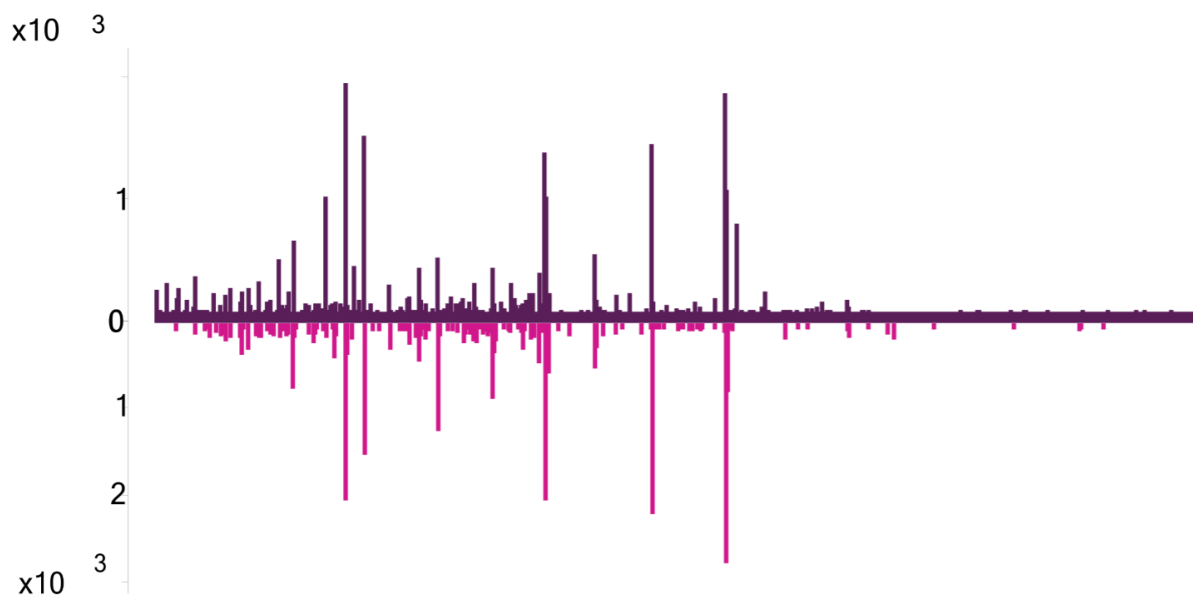

**Figure S11.** Overlaid raw CID fragmentation spectra (collision energy = 20.0 eV, precursor ion: 695.30 Da/e) for GC $\beta$ WLSADEFPHG ( $\beta$  =  $\beta$ -alanine) peptide identified from a library sequencing analysis (purple color, top spectrum) and its authentic, separately re-synthesized counterpart (pink color, bottom spectrum).

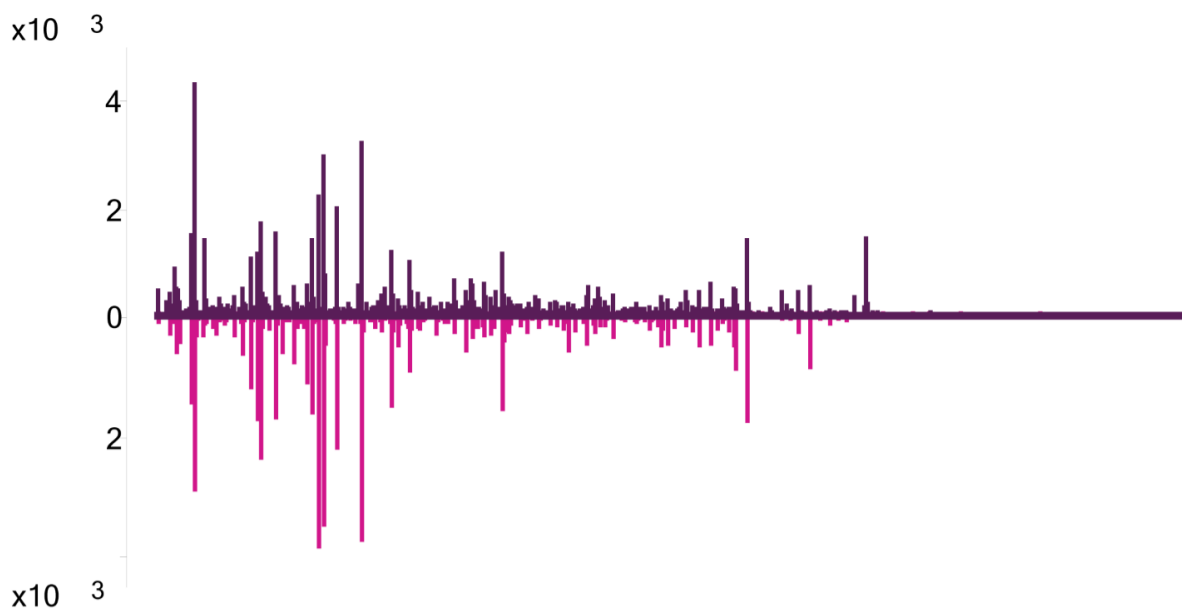

**Figure S12.** Overlaid raw CID fragmentation spectra (collision energy = 22.2 eV, precursor ion: 686.29 Da/e) for GC $\beta$ FLDEGYGPWG ( $\beta$  =  $\beta$ -alanine) peptide identified from a library sequencing analysis (purple color, top spectrum) and its authentic, separately re-synthesized counterpart (pink color, bottom spectrum).

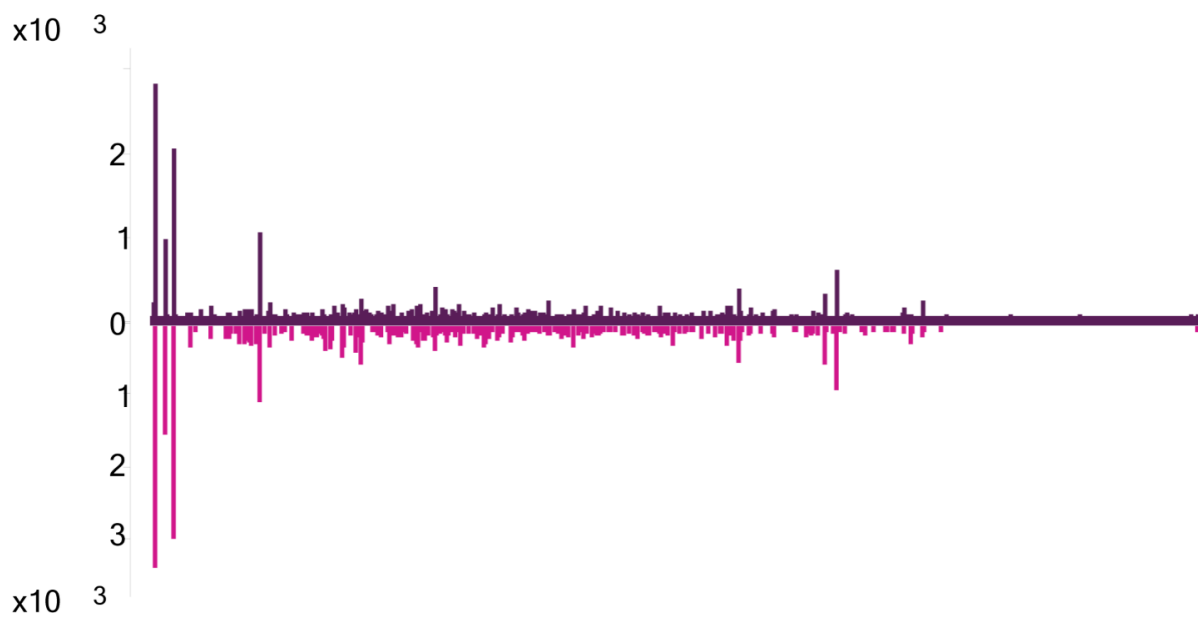

**Figure S13.** Overlaid raw CID fragmentation spectra (collision energy = 22.8 eV, precursor ion: 701.28 Da/e) for GCβWLDEDTFMGG ( $\beta = \beta$ -alanine) peptide identified from a library sequencing analysis (purple color, top spectrum) and its authentic, separately re-synthesized counterpart (pink color, bottom spectrum).

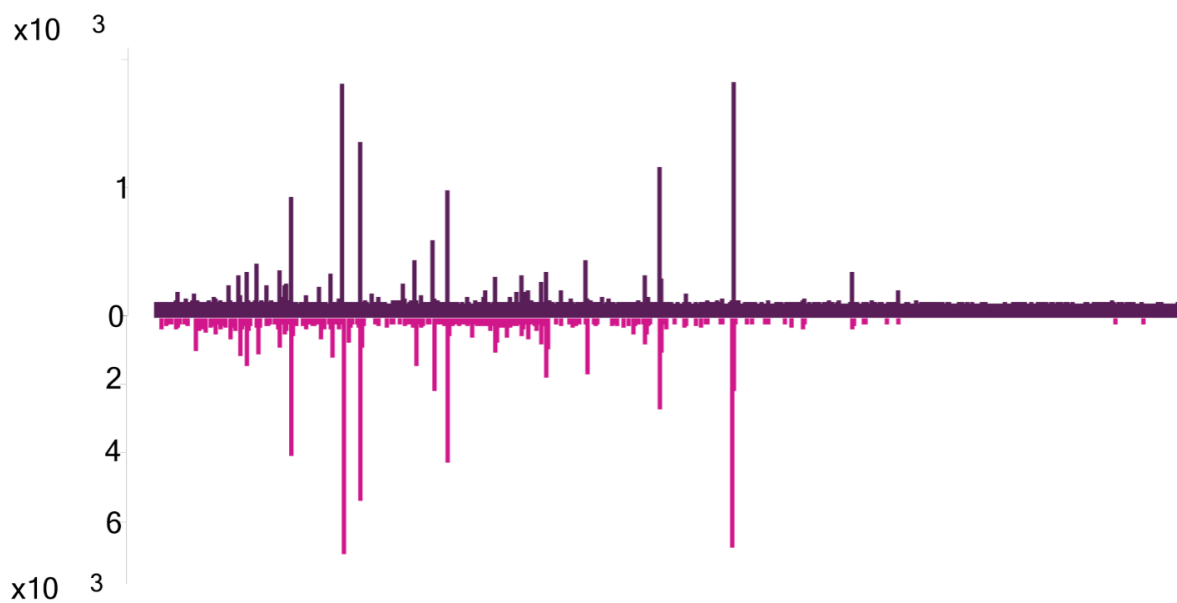

**Figure S14.** Overlaid raw CID fragmentation spectra (collision energy = 23.0 eV, precursor ion: 708.31 Da/e) for GCβWLDTDPFPHG ( $\beta = \beta$ -alanine) peptide identified from a library sequencing analysis (purple color, top spectrum) and its authentic, separately re-synthesized counterpart (pink color, bottom spectrum).

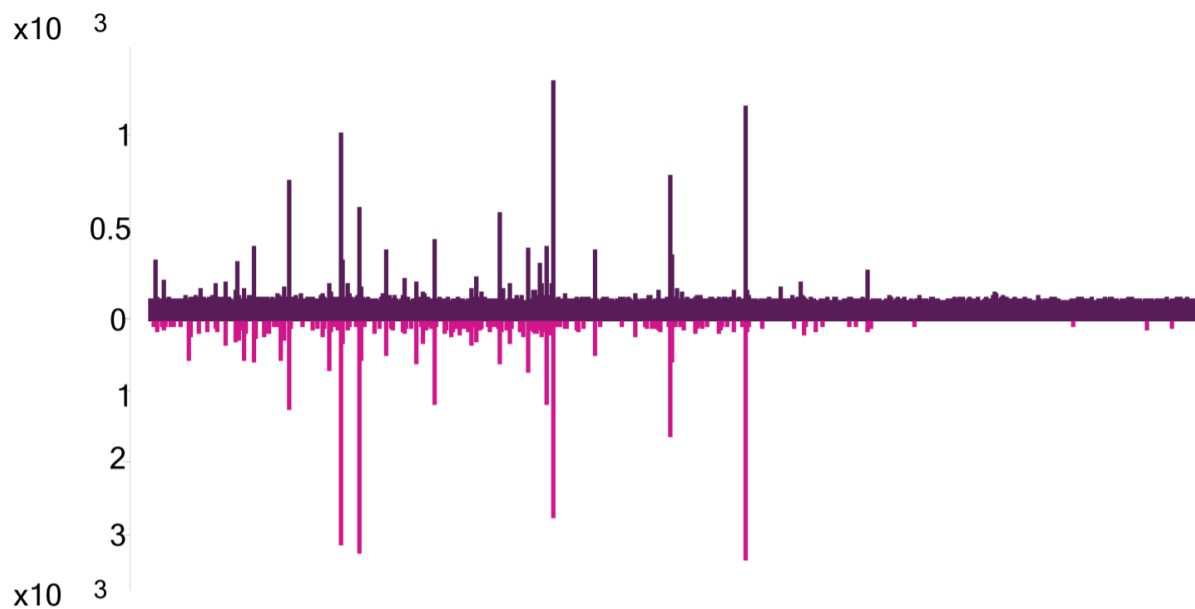

**Figure S15.** Overlaid raw CID fragmentation spectra (collision energy = 20.6 eV, precursor ion: 710.30 Da/e) for GC $\beta$ WLDTSEFPHG ( $\beta$  =  $\beta$ -alanine) peptide identified from a library sequencing analysis (purple color, top spectrum) and its authentic, separately re-synthesized counterpart (pink color, bottom spectrum).

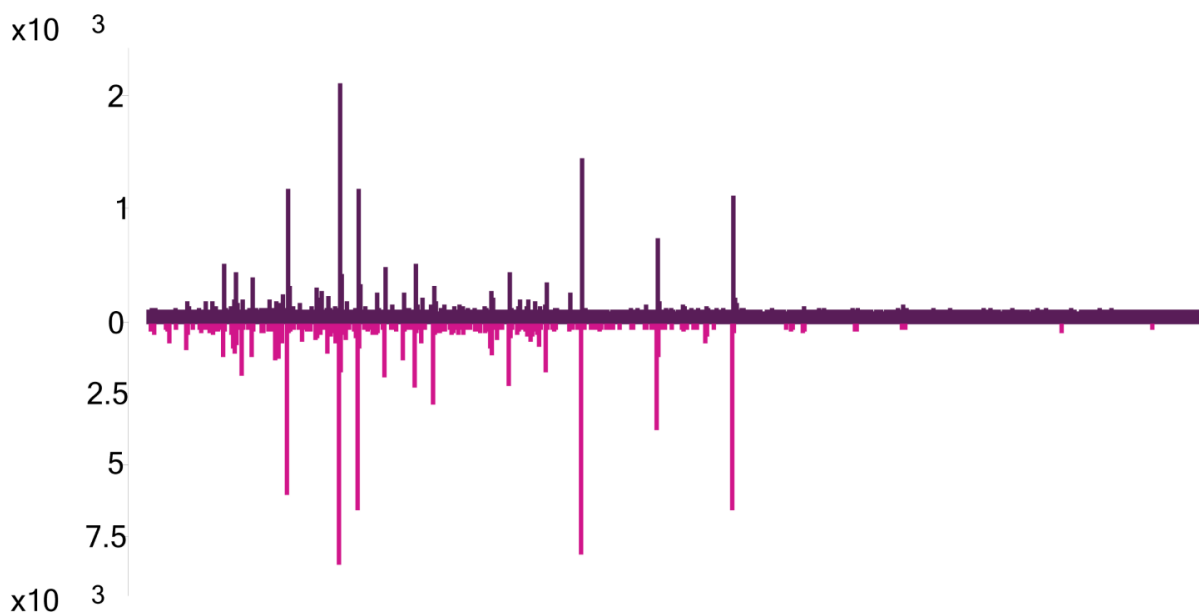

**Figure S16.** Overlaid raw CID fragmentation spectra (collision energy = 22.7 eV, precursor ion: 700.33 Da/e) for GC $\beta$ WLDPSLFPHG ( $\beta$  =  $\beta$ -alanine) peptide identified from a library sequencing analysis (purple color, top spectrum) and its authentic, separately re-synthesized counterpart (pink color, bottom spectrum).

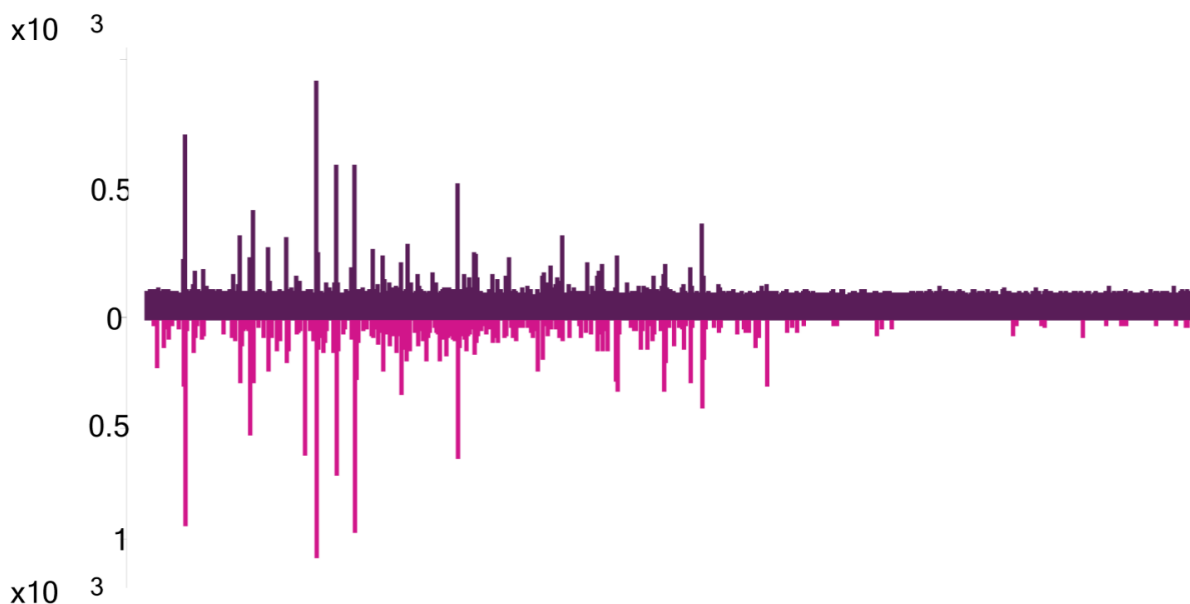

**Figure S17.** Overlaid raw CID fragmentation spectra (collision energy = 21.0 eV, precursor ion: 653.76 Da/e) for GC $\beta$ WADESAGPWG ( $\beta$  =  $\beta$ -alanine) peptide identified from a library sequencing analysis (purple color, top spectrum) and its authentic, separately re-synthesized counterpart (pink color, bottom spectrum).

### 3.3. Construction of alternating monomer sets

Monomer subsets are constructed by dividing the total monomer pool into two subsets of equal size:

$$\mathcal{M}_1 \in \mathcal{M}, \mathcal{M}_2 = \mathcal{M} \cap \mathcal{M}_1 \quad (1)$$

such that

$$\forall p_1, p_2 \in \mathcal{M}_1, \forall q_1, q_2 \in \mathcal{M}_2: ||m(p_1) - m(p_2)| - |m(q_1) - m(q_2)|| > \varepsilon, \quad (2)$$

where  $m(p)$  is molecular weight of a monomer  $p$  in Da, and  $\varepsilon$  is a constant (in Da) determined by the accuracy of the mass spectrometer used for sequencing. We used  $\varepsilon=0$  to construct our monomer subsets, but the values of up to 0.01 Da yield identical results for proteogenic amino acids.

Table S1 provides molecular weights for all possible ss<sub>1</sub>-ss<sub>2</sub> dipeptide subsequences. As evident from the table, every dipeptide has unique mass, which eliminates ambiguous dipeptide assignments.

**Table S1.** Monoisotopic masses in Da of all dipeptides encodable with the alternating monomer set library design. ss<sub>1</sub>: amino acid subset 1, ss<sub>2</sub>: amino acid subset 2.

| ss <sub>1</sub> \ ss <sub>2</sub> | A      | E      | G      | Q      | S      | T      | V      | Y      |
|-----------------------------------|--------|--------|--------|--------|--------|--------|--------|--------|
| D                                 | 186.06 | 244.07 | 172.05 | 243.09 | 202.06 | 216.07 | 214.10 | 278.09 |
| F                                 | 218.11 | 276.11 | 204.09 | 275.13 | 234.10 | 248.12 | 246.14 | 310.13 |
| H                                 | 208.10 | 266.10 | 194.08 | 265.12 | 224.09 | 238.11 | 236.13 | 300.12 |
| K                                 | 199.13 | 257.14 | 185.12 | 256.15 | 215.13 | 229.14 | 227.16 | 291.16 |
| L                                 | 184.12 | 242.13 | 170.11 | 241.14 | 200.12 | 214.13 | 212.15 | 276.15 |
| M                                 | 202.08 | 260.08 | 188.06 | 259.10 | 218.07 | 232.09 | 230.11 | 294.10 |
| P                                 | 168.09 | 226.10 | 154.07 | 225.11 | 184.08 | 198.10 | 196.12 | 260.12 |
| W                                 | 257.12 | 315.12 | 243.10 | 314.14 | 273.11 | 287.13 | 285.15 | 349.14 |

### 3.4. Amino acid frequency distribution $\chi^2$ -test for the sample of 660 library 1 beads

As Table S2 indicates, we found no evidence that there is statistically significant difference between assigned and designed amino acid frequencies (P-value=0.42) in the studied sample (n=587).

**Table S2.**  $\chi^2$ -test statistic table for the amino acid distribution in the sample of 660 library 1 beads

|         | pos1  | pos2 | pos3 | pos4 | pos5  | pos6 | pos7 | pos8  | pos9 | Sum   | P-value |
|---------|-------|------|------|------|-------|------|------|-------|------|-------|---------|
| D       | 0.18  |      | 1.54 |      | 5.12  |      | 0.74 |       | 0.39 | 7.97  | 0.09    |
| F       | 2.92  |      | 1.76 |      | 0.60  |      | 0.60 |       | 0.60 | 6.47  | 0.17    |
| H       | 4.60  |      | 0.00 |      | 2.09  |      | 1.20 |       | 0.39 | 8.28  | 0.08    |
| K       | 0.26  |      | 0.74 |      | 0.00  |      | 0.18 |       | 0.55 | 1.74  | 0.78    |
| L       | 0.04  |      | 2.53 |      | 0.18  |      | 0.96 |       | 2.53 | 6.23  | 0.18    |
| M       | 0.16  |      | 0.79 |      | 1.26  |      | 0.60 |       | 0.60 | 3.41  | 0.49    |
| P       | 0.74  |      | 0.55 |      | 1.26  |      | 0.60 |       | 1.47 | 4.62  | 0.33    |
| W       | 2.53  |      | 0.55 |      | 0.09  |      | 0.04 |       | 0.01 | 3.22  | 0.52    |
| A       |       | 0.08 |      | 0.43 |       | 0.00 |      | 0.03  |      | 0.54  | 0.91    |
| E       |       | 0.04 |      | 0.08 |       | 0.43 |      | 0.29  |      | 0.84  | 0.84    |
| G       |       | 0.03 |      | 1.01 |       | 1.01 |      | 6.82  |      | 8.88  | 0.03    |
| Q       |       | 0.60 |      | 0.08 |       | 0.55 |      | 0.96  |      | 2.18  | 0.53    |
| S       |       | 0.08 |      | 2.09 |       | 0.04 |      | 0.39  |      | 2.59  | 0.46    |
| T       |       | 0.26 |      | 0.03 |       | 0.03 |      | 1.84  |      | 2.15  | 0.54    |
| V       |       | 2.53 |      | 0.04 |       | 0.60 |      | 0.01  |      | 3.17  | 0.37    |
| Y       |       | 1.76 |      | 0.09 |       | 2.82 |      | 5.80  |      | 10.47 | 0.01    |
| Sum     | 11.42 | 5.37 | 8.48 | 3.84 | 10.60 | 5.48 | 4.90 | 16.13 | 6.54 | 72.76 | 0.42    |
| P-value | 0.12  | 0.62 | 0.29 | 0.80 | 0.16  | 0.60 | 0.67 | 0.02  | 0.48 | 0.42  |         |



### 3.5. Peptide separation on nano-LC

To illustrate the ability of nLC to separate mixtures containing hundreds of peptides we analyzed the 306 bead sample of library 1 peptides (section 3.1). To this end, we overlaid the chromatogram with the peptide identification timeline (the list of retention times for parsed sequences identified from the analysis) as shown in Fig. S18A. We found that that the chromatogram maintains individual features, and that peptides are identified throughout the duration of the nLC gradient. Additionally, we manually analyzed primary mass spectra obtained for this and other samples to ensure that individual ion signals do not consistently overlap, which becomes an important consideration during the isolation of individual precursor ions for further CID and HCD fragmentation. Two characteristic primary spectra observed throughout the course of the study are shown in Fig. S18B and S18C. Based on these observations we concluded that the use of nLC for the analysis of complex mixtures of synthetic peptides is fully adequate.

**A**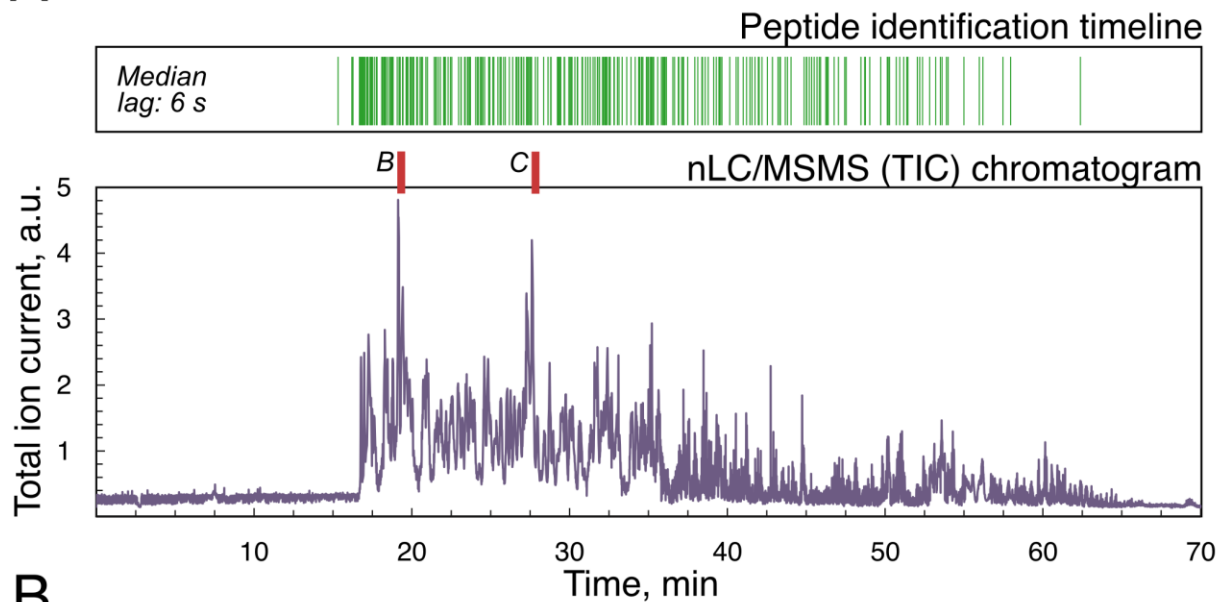**B**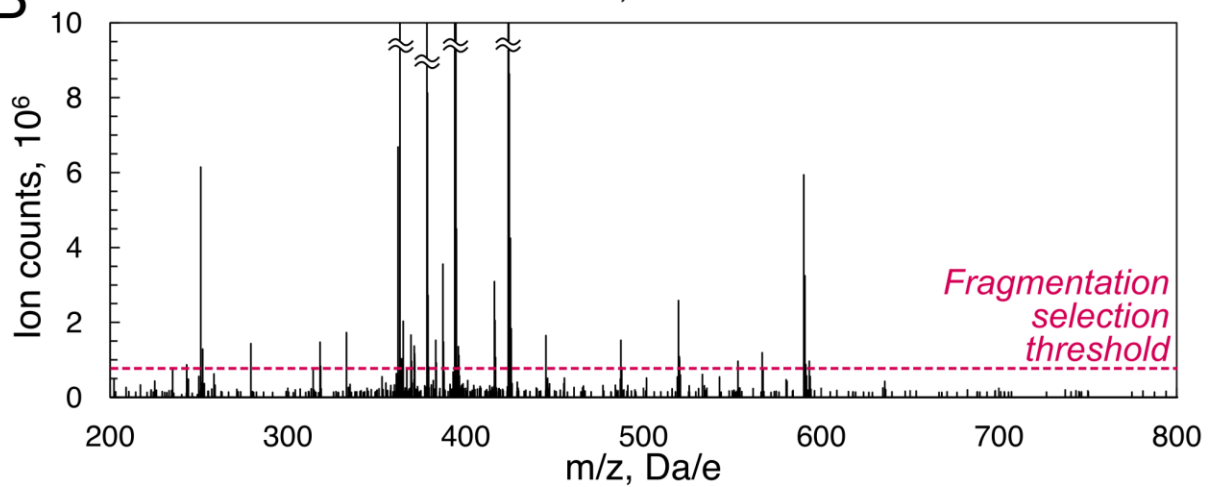**C**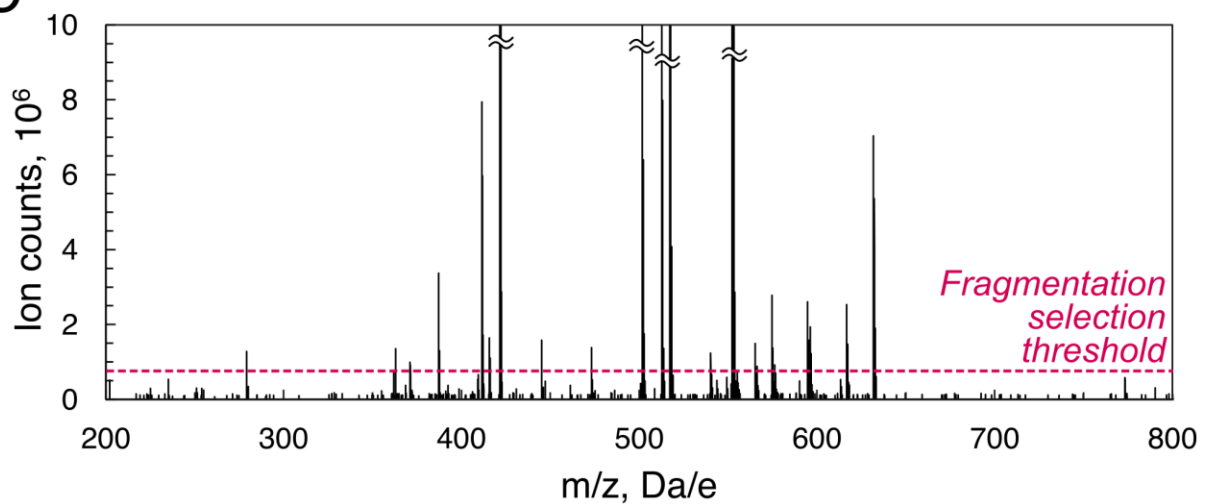

**Figure S18.** A) Overlay of a nLC/MSMS (TIC) chromatogram for the 306 bead sample (section 3.1) containing library 1 peptides with the peptide identification timeline (each vertical line represents an identified peptides; retention time values are taken from Appendix II). Peptides are identified throughout the gradient run time (median time between successive peptide identification events is 6 sec, mean value is 10 sec). B) Primary mass spectrum snapshot at 19.13 min of the LCMS run shown in A). Four most intense peaks are out of scale. The spectrum is clean with little to no m/z overlap between eluting peptides, which allows individual isolation of precursor ions for fragmentation. C) Analogously to B), primary mass spectrum snapshot at 27.61 min.

## Appendix I. Sequences identified from the 660 bead sample

| ALC | Area     | Mass      | Peptide     | RT    | Scan | m/z      | ppm  | z |
|-----|----------|-----------|-------------|-------|------|----------|------|---|
| 70  | 3.96E+04 | 1021.4828 | PGKVPSHEDG  | 7.97  | 1041 | 341.5004 | -1.3 | 3 |
| 62  | 6.16E+04 | 1132.5049 | HTPAHVHYDG  | 7.98  | 1044 | 378.5075 | -1.4 | 3 |
| 83  | 6.49E+05 | 1164.604  | HVLSHQPYKG  | 15.85 | 2076 | 389.2073 | -1.2 | 3 |
| 51  | 7.56E+05 | 1132.6604 | KVLGKQKEFG  | 15.88 | 2082 | 378.5596 | -0.9 | 3 |
| 55  | 2.37E+05 | 1140.4736 | HGDIFYHTHG  | 15.96 | 2094 | 381.1639 | -1.2 | 3 |
| 88  | 1.52E+05 | 1146.5571 | PYHVLSHTHG  | 16.06 | 2111 | 383.1917 | -1.1 | 3 |
| 60  | 1.20E+05 | 1162.5806 | KSKYLAHEMG  | 16.07 | 2114 | 388.5327 | -1.5 | 3 |
| 80  | 5.77E+05 | 1124.5549 | HAMAHQKVFG  | 16.23 | 2157 | 375.8578 | -0.9 | 3 |
| 71  | 3.87E+05 | 1269.5527 | HEFYHSHEKG  | 16.23 | 2159 | 424.1903 | -0.6 | 3 |
| 51  | 1.34E+05 | 1195.5193 | HEHMAKYHG   | 16.24 | 2162 | 399.5124 | -1.2 | 3 |
| 81  | 2.44E+06 | 1172.5186 | MGKTHGWYHG  | 16.3  | 2181 | 391.8455 | -1.1 | 3 |
| 89  | 2.59E+05 | 1155.5671 | HTHSFEKTLG  | 16.31 | 2185 | 578.7894 | -0.4 | 2 |
| 97  | 2.36E+06 | 1192.5989 | LSHTKVHEWG  | 16.38 | 2209 | 597.3052 | -0.3 | 2 |
| 79  | 2.28E+07 | 1123.5266 | HVKEMGHVMG  | 16.38 | 2211 | 375.515  | -0.9 | 3 |
| 91  | 2.31E+06 | 1068.6113 | MALVKVKSHG  | 16.39 | 2213 | 357.21   | -0.8 | 3 |
| 95  | 1.88E+07 | 1115.5513 | HYLGHGFTKG  | 16.44 | 2236 | 372.8564 | -1.2 | 3 |
| 75  | 4.59E+07 | 1094.7175 | KVKVLQKVPG  | 16.45 | 2243 | 365.912  | -0.8 | 3 |
| 78  | 1.11E+07 | 1094.5542 | HTMTPQKVPG  | 16.46 | 2245 | 548.2831 | -0.2 | 2 |
| 86  | 4.84E+06 | 1228.5261 | DGHYHEWTKG  | 16.5  | 2266 | 410.5146 | -1.3 | 3 |
| 85  | 3.76E+07 | 1213.6277 | KVWVHTMEKG  | 16.55 | 2287 | 405.5483 | -1.5 | 3 |
| 63  | 4.94E+06 | 1234.573  | FQHQKTFQDG  | 16.55 | 2291 | 618.292  | -0.7 | 2 |
| 83  | 4.49E+06 | 1135.5081 | HEALTHQMSPG | 16.56 | 2295 | 568.7596 | -0.7 | 2 |
| 86  | 2.89E+06 | 1247.5427 | MEHQMYPQKG  | 16.56 | 2299 | 624.7768 | -0.8 | 2 |
| 96  | 8.03E+06 | 1182.5208 | FTHADYHVHG  | 16.58 | 2305 | 395.1796 | -1.1 | 3 |
| 91  | 8.04E+06 | 1203.6145 | MYMGKVYKYG  | 16.6  | 2316 | 402.2108 | -1.0 | 3 |
| 88  | 2.52E+07 | 1255.6746 | KYKVFQKQMG  | 16.61 | 2320 | 419.5643 | -0.6 | 3 |
| 74  | 1.52E+07 | 1085.5154 | HSWGLVHGHG  | 16.64 | 2337 | 362.8447 | -0.8 | 3 |
| 95  | 1.05E+07 | 1110.5378 | FVDSKAKEMG  | 16.65 | 2339 | 556.2748 | -0.4 | 2 |
| 90  | 2.33E+06 | 1242.6396 | FEKAKSKYWG  | 16.65 | 2343 | 415.2193 | -0.8 | 3 |
| 92  | 1.92E+06 | 1103.54   | FTKYPAPSHG  | 16.7  | 2368 | 552.776  | -0.1 | 2 |
| 94  | 1.80E+07 | 1260.5522 | DYKVDQHYHG  | 16.73 | 2385 | 421.1905 | 0.1  | 3 |
| 84  | 1.93E+07 | 1127.4641 | MYHGPMAHG   | 16.74 | 2391 | 376.8275 | -0.9 | 3 |
| 60  | 9.07E+05 | 964.4977  | KAPVDGPPG   | 16.78 | 2406 | 483.2549 | -0.4 | 2 |
| 96  | 1.25E+06 | 1244.5396 | KYHEHTWGMG  | 16.79 | 2412 | 623.2758 | 0.1  | 2 |
| 84  | 1.76E+06 | 1055.54   | PAKYLSPSHG  | 16.84 | 2433 | 352.8528 | -1.0 | 3 |
| 56  | 5.27E+06 | 1162.5439 | KQWAKEDAMG  | 16.89 | 2456 | 582.278  | 0.0  | 2 |
| 60  | 3.60E+06 | 1095.6223 | KQHVKVMGLG  | 16.9  | 2460 | 548.8173 | 0.1  | 2 |
| 92  | 1.25E+07 | 1062.5093 | PQLQHTPADG  | 16.9  | 2462 | 532.2607 | -0.1 | 2 |

|    |          |           |             |       |      |          |      |   |
|----|----------|-----------|-------------|-------|------|----------|------|---|
| 90 | 7.24E+05 | 1236.5234 | WEMSKYPSHG  | 16.92 | 2474 | 619.2676 | 0.0  | 2 |
| 98 | 3.40E+06 | 1222.6345 | KVHYKYLTGD  | 16.93 | 2480 | 612.3232 | 0.1  | 2 |
| 97 | 2.18E+06 | 1166.6006 | PEKTLYMTKG  | 16.98 | 2500 | 584.3062 | -0.2 | 2 |
| 93 | 2.53E+06 | 1157.5498 | DTMQLTKQHG  | 16.98 | 2502 | 579.7808 | -0.1 | 2 |
| 62 | 3.70E+05 | 998.5583  | KAMVPAPTKG  | 17.01 | 2516 | 333.859  | -1.0 | 3 |
| 95 | 1.32E+07 | 1136.5898 | KYLAKTMEPG  | 17.11 | 2559 | 569.3013 | 0.6  | 2 |
| 94 | 1.79E+06 | 1149.5488 | KEMTKSWSPG  | 17.12 | 2561 | 575.7808 | 0.6  | 2 |
| 87 | 6.71E+05 | 1198.6135 | FYFTKTKAHG  | 17.18 | 2586 | 300.6595 | -1.7 | 4 |
| 90 | 1.20E+06 | 1213.6455 | FVKQHEKELG  | 17.23 | 2605 | 405.5544 | -1.3 | 3 |
| 97 | 1.73E+06 | 1077.4912 | LGKADYHSMG  | 17.24 | 2612 | 539.7518 | 0.3  | 2 |
| 94 | 5.29E+06 | 1104.5386 | LQHAKSMSFG  | 17.26 | 2620 | 553.2756 | 0.5  | 2 |
| 91 | 1.90E+06 | 1177.5374 | FQMQHTKAMG  | 17.3  | 2635 | 589.7747 | 0.0  | 2 |
| 87 | 2.91E+06 | 1153.5261 | HSKAMYLTMG  | 17.33 | 2650 | 577.7689 | -0.4 | 2 |
| 96 | 2.49E+07 | 1125.5488 | HVLEPSMEKG  | 17.4  | 2675 | 563.7803 | -0.2 | 2 |
| 96 |          | 1171.5774 | FVDVKAHYHG  | 17.42 | 2686 | 586.7947 | 0.1  | 2 |
| 95 | 1.37E+06 | 1244.5574 | WTHSWTKQDG  | 17.5  | 2719 | 623.2844 | -0.4 | 2 |
| 94 | 3.48E+06 | 1190.572  | PYHQFVDTKG  | 17.53 | 2736 | 596.2916 | -0.7 | 2 |
| 77 | 1.16E+07 | 1109.5176 | DTMTKGWSKG  | 17.64 | 2781 | 370.8453 | -1.0 | 3 |
| 93 | 5.65E+06 | 1183.5508 | FGKEKEDQFG  | 17.65 | 2785 | 592.7814 | 0.0  | 2 |
| 41 | 2.62E+05 | 1011.5025 | DGLTFGFAKG  | 17.65 | 2789 | 506.755  | -4.8 | 2 |
| 93 | 1.14E+06 | 1291.6211 | HQWSHVQWGW  | 17.67 | 2797 | 646.8165 | 0.1  | 2 |
| 96 | 4.71E+06 | 1002.5345 | DEKGLGKSLG  | 17.74 | 2825 | 502.2732 | -0.6 | 2 |
| 97 | 6.59E+05 | 1110.5413 | MSMELTKSKG  | 17.87 | 2883 | 556.2766 | -0.2 | 2 |
| 87 | 2.50E+07 | 1077.4993 | PQHGFGLEHG  | 17.89 | 2890 | 360.1725 | -1.2 | 3 |
| 82 | 1.74E+07 | 1073.5505 | KTDVKSWSGPG | 17.89 | 2892 | 537.7814 | 0.0  | 2 |
| 94 | 1.14E+07 | 1083.4656 | LAMQHEDSPG  | 17.9  | 2894 | 542.7386 | -0.5 | 2 |
| 89 | 2.91E+06 | 1061.5042 | WAHTLSPGHG  | 17.9  | 2896 | 531.7581 | -0.1 | 2 |
| 95 | 1.54E+06 | 1011.4985 | DGLTDAKVHG  | 18.04 | 2957 | 506.7552 | -0.5 | 2 |
| 95 | 2.29E+06 | 1071.5195 | DVDSLTKTHG  | 18.12 | 2990 | 536.7659 | 0.1  | 2 |
| 88 | 4.66E+05 | 1225.5913 | WSKQMSFQKG  | 18.14 | 2999 | 613.8013 | -0.4 | 2 |
| 77 | 2.43E+06 | 1106.5508 | WTPGPVKEHG  | 18.18 | 3014 | 554.2809 | -1.0 | 2 |
| 94 | 1.02E+07 | 1015.4909 | KVPGHSMGFG  | 18.2  | 3023 | 508.7513 | -0.5 | 2 |
| 93 | 2.55E+07 | 1137.5276 | FTHAPSMYKG  | 18.22 | 3030 | 380.1821 | -0.5 | 3 |
| 94 | 2.45E+07 | 1038.4739 | HAMAMTHALG  | 18.24 | 3040 | 520.243  | -0.1 | 2 |
| 82 | 2.55E+06 | 1130.5508 | WTHSKAFTPG  | 18.25 | 3046 | 566.2814 | 0.0  | 2 |
| 81 | 2.40E+06 | 1156.5586 | MEKGKTFYPG  | 18.26 | 3050 | 579.2852 | -0.2 | 2 |
| 93 | 5.99E+07 | 972.5029  | LVPGEHPAPG  | 18.5  | 3156 | 487.2573 | -0.8 | 2 |
| 94 | 2.94E+06 | 1024.4548 | PGHGMSHVFG  | 18.52 | 3166 | 513.2332 | -0.8 | 2 |
| 78 | 4.04E+07 | 1016.496  | MALQKGDTPG  | 18.59 | 3198 | 509.2538 | -0.8 | 2 |
| 94 | 1.55E+06 | 1200.5046 | DEWVDEHSGK  | 18.64 | 3224 | 601.2576 | -1.1 | 2 |
| 84 | 1.61E+07 | 1139.5547 | MTPVWGKQHG  | 18.7  | 3246 | 380.8574 | -1.7 | 3 |

|    |          |           |             |       |      |          |      |   |
|----|----------|-----------|-------------|-------|------|----------|------|---|
| 96 | 3.56E+06 | 1126.6135 | PYKQHTLALG  | 18.71 | 3252 | 564.3123 | -1.0 | 2 |
| 87 | 4.63E+07 | 1182.5935 | FGHVWQKQPG  | 18.75 | 3271 | 395.2038 | -1.1 | 3 |
| 95 | 2.00E+07 | 1091.5037 | PSFSKGFHEG  | 18.79 | 3288 | 364.8407 | -1.0 | 3 |
| 96 | 2.69E+06 | 1130.572  | FSHVDQLTKG  | 18.8  | 3290 | 566.2919 | -0.2 | 2 |
| 94 | 2.29E+06 | 1234.5176 | DEDYKYMSKG  | 18.88 | 3329 | 618.2643 | -0.6 | 2 |
| 96 | 5.52E+06 | 1065.4993 | LGDQHGHVFG  | 19.01 | 3384 | 533.7554 | -0.6 | 2 |
| 86 | 3.86E+06 | 1187.5029 | HQHSLYDTMG  | 19.02 | 3390 | 594.7557 | -2.9 | 2 |
| 94 | 1.11E+07 | 1085.5505 | LVFEHADAKG  | 19.09 | 3422 | 543.7814 | 0.0  | 2 |
| 57 | 5.00E+05 | 1193.6016 | KYFGKVHQMGM | 19.13 | 3440 | 398.873  | -1.6 | 3 |
| 57 | 3.86E+06 | 1122.5168 | LGDQWAMVFG  | 19.17 | 3455 | 375.1793 | 1.6  | 3 |
| 83 | 1.92E+07 | 1225.5264 | HAWQHQDTFG  | 19.24 | 3487 | 613.769  | -0.1 | 2 |
| 89 | 5.20E+05 | 1137.5276 | PTHGMTFYKG  | 19.25 | 3491 | 569.7694 | -0.7 | 2 |
| 96 | 1.27E+06 | 1235.5723 | HEHYFAKTFG  | 19.26 | 3493 | 618.7923 | 0.4  | 2 |
| 96 | 4.07E+06 | 1129.5767 | PTLEKTFTHG  | 19.34 | 3561 | 565.7944 | 0.1  | 2 |
| 76 | 3.60E+06 | 1075.5483 | KAKTPSWAMG  | 19.34 | 3531 | 538.7802 | -0.2 | 2 |
| 87 | 2.42E+07 | 993.4702  | MSPGPALQHG  | 19.54 | 3615 | 497.741  | -0.5 | 2 |
| 56 | 1.28E+06 | 1006.3814 | HADADAFGMG  | 19.55 | 3619 | 504.1964 | -1.0 | 2 |
| 91 | 3.96E+07 | 1089.5608 | FYLGHAPTKG  | 19.59 | 3634 | 364.1929 | -1.3 | 3 |
| 81 | 1.53E+07 | 1071.5237 | PYPEKAPVDG  | 19.59 | 3636 | 536.7677 | -0.4 | 2 |
| 52 | 5.33E+05 | 1256.5938 | WTPEHQFQKG  | 19.6  | 3642 | 629.3035 | 1.1  | 2 |
| 61 | 1.86E+07 | 1231.5444 | HYWEKGMQPG  | 19.63 | 3653 | 616.7777 | -0.7 | 2 |
| 95 | 1.25E+06 | 1151.5068 | PYFSMGKEHG  | 19.69 | 3682 | 576.7589 | -0.9 | 2 |
| 86 | 6.88E+06 | 1168.5256 | KEKYPEMGMG  | 19.75 | 3708 | 585.2684 | -0.6 | 2 |
| 80 | 6.59E+06 | 1078.4788 | DTMQPAKTMG  | 19.78 | 3721 | 540.2451 | -0.8 | 2 |
| 94 | 5.86E+06 | 1003.4822 | DTPGLTDTKG  | 19.91 | 3778 | 502.7476 | 0.7  | 2 |
| 89 | 2.68E+06 | 1210.5442 | MSHEFTFQKG  | 19.92 | 3782 | 404.521  | -0.4 | 3 |
| 95 | 3.04E+07 | 1190.5391 | HVDEKQMTFG  | 19.95 | 3795 | 596.2758 | 0.4  | 2 |
| 97 | 9.34E+06 | 1114.5593 | LAWTKTHAMG  | 20.09 | 3858 | 558.2854 | -0.6 | 2 |
| 98 | 2.64E+07 | 1080.491  | FGMQKTPTDG  | 20.1  | 3862 | 541.2515 | -0.1 | 2 |
| 82 | 1.46E+07 | 1163.5359 | DQPVFVHEHG  | 20.11 | 3866 | 582.7734 | -1.0 | 2 |
| 55 | 7.84E+06 | 1082.5508 | KGHQFAPELG  | 20.35 | 3969 | 542.2814 | -0.2 | 2 |
| 93 | 3.40E+06 | 1055.4519 | DVDQDGHTLG  | 20.36 | 3979 | 528.7318 | -0.5 | 2 |
| 96 | 3.60E+06 | 1147.5696 | LTKEMGLYHG  | 20.44 | 4011 | 574.7905 | -0.5 | 2 |
| 97 | 2.54E+07 | 1063.4836 | HVLGWSDBGHG | 20.47 | 4025 | 532.7476 | -0.6 | 2 |
| 91 | 6.41E+06 | 1132.5334 | KTDQFAMVHG  | 20.54 | 4055 | 567.2726 | -0.2 | 2 |
| 76 | 2.34E+06 | 1163.4224 | DEDTMTHQMG  | 20.68 | 4119 | 582.7174 | 0.4  | 2 |
| 94 | 2.28E+07 | 1073.4236 | PGMGHEFQDG  | 20.69 | 4124 | 537.7175 | -0.7 | 2 |
| 98 | 2.52E+06 | 1149.5818 | PAWEFSKTKG  | 20.7  | 4126 | 575.7965 | -0.7 | 2 |
| 95 | 4.84E+07 | 1034.5298 | HALGHYPALG  | 20.7  | 4128 | 518.2706 | -0.9 | 2 |
| 91 | 6.72E+06 | 1108.4529 | DQKSMSMEPG  | 20.83 | 4183 | 555.2321 | -0.8 | 2 |
| 58 | 4.42E+06 | 1162.5659 | FTDYKKGKTFG | 20.91 | 4220 | 388.528  | -0.9 | 3 |

|    |          |           |            |       |      |          |      |   |
|----|----------|-----------|------------|-------|------|----------|------|---|
| 93 | 6.98E+06 | 926.3916  | DGLGPGHSMG | 20.93 | 4229 | 464.2019 | -0.3 | 2 |
| 97 | 1.67E+07 | 1121.5327 | HYMGPVFSKG | 21.02 | 4269 | 561.7717 | -1.2 | 2 |
| 83 | 6.91E+06 | 1240.5083 | PEHQHGWMG  | 21.03 | 4271 | 621.2595 | -1.0 | 2 |
| 65 | 1.46E+06 | 1128.4395 | DEMVHEDTPG | 21.11 | 4305 | 565.2251 | -1.2 | 2 |
| 94 | 4.61E+06 | 1225.5801 | LTHYFEKTMG | 21.23 | 4355 | 613.7955 | -0.7 | 2 |
| 93 | 2.54E+06 | 1127.4785 | WTFSHADAHG | 21.24 | 4358 | 564.7449 | -0.7 | 2 |
| 90 | 8.98E+06 | 990.444   | DADGLGKQMG | 21.38 | 4417 | 496.2278 | -0.8 | 2 |
| 92 | 1.59E+06 | 1141.5703 | WQHVLGMSKG | 21.42 | 4432 | 571.7908 | -0.7 | 2 |
| 81 | 9.31E+06 | 1191.5771 | KSDTKEWELG | 21.44 | 4441 | 596.7943 | -0.4 | 2 |
| 90 | 2.42E+07 | 1136.4709 | HSWYDGKGMG | 21.61 | 4515 | 569.2415 | -0.1 | 2 |
| 78 | 4.72E+06 | 1044.4148 | DYHADVDGPG | 21.62 | 4517 | 523.2134 | -0.2 | 2 |
| 67 | 5.65E+05 | 1102.5559 | LSHGKAWTFG | 21.69 | 4571 | 552.2841 | 0.1  | 2 |
| 93 | 2.78E+06 | 1092.4758 | DSKQMALEDG | 21.64 | 4527 | 547.2437 | -0.5 | 2 |
| 87 | 1.70E+06 | 1048.4824 | KTFAPQDADG | 21.67 | 4538 | 525.2471 | -0.4 | 2 |
| 81 | 3.01E+07 | 936.4124  | DVPGPAHGMG | 21.7  | 4555 | 469.2122 | -0.6 | 2 |
| 50 | 4.57E+06 | 1164.52   | DEPVHEHVFG | 21.73 | 4565 | 389.1793 | -1.3 | 3 |
| 96 | 1.90E+07 | 1154.5906 | HVWVMTKTPG | 21.77 | 4584 | 578.3011 | -0.4 | 2 |
| 95 | 1.71E+06 | 1256.5574 | HEDAWQKTWG | 21.78 | 4588 | 629.2844 | -0.2 | 2 |
| 89 | 6.55E+06 | 1233.6506 | WVFKQDQKG  | 21.89 | 4641 | 617.8307 | -0.8 | 2 |
| 54 | 1.17E+05 | 1048.5454 | HALAHYPALG | 21.91 | 4647 | 525.2786 | -0.4 | 2 |
| 96 | 7.05E+06 | 1147.5662 | FTFVKSPHEG | 21.93 | 4658 | 574.7887 | -0.7 | 2 |
| 94 | 5.55E+06 | 1116.5273 | PVMGPTWEKG | 21.96 | 4668 | 559.2692 | -0.9 | 2 |
| 57 | 5.23E+06 | 1137.531  | HSMAYLTMG  | 21.98 | 4677 | 569.7715 | -0.1 | 2 |
| 88 | 2.89E+07 | 1106.5356 | LQLADEPQHG | 21.99 | 4681 | 554.2736 | -0.6 | 2 |
| 88 | 2.95E+07 | 1127.5513 | WEPVHAPVHG | 22.04 | 4704 | 376.8566 | -0.6 | 3 |
| 96 | 1.07E+06 | 1189.5374 | KSMVMQWSHG | 22.06 | 4714 | 595.7741 | -0.9 | 2 |
| 95 | 6.43E+06 | 1101.6545 | PQLGKVKYLG | 22.12 | 4740 | 551.8333 | 0.0  | 2 |
| 83 | 9.95E+06 | 1141.5801 | MSHEKVLELG | 22.16 | 4757 | 571.7961 | 0.0  | 2 |
| 95 | 3.10E+07 | 1210.6135 | PTKQFGWYKG | 22.16 | 4761 | 404.5438 | -1.0 | 3 |
| 93 | 3.33E+07 | 1136.5171 | PVFEKSMQDG | 22.25 | 4799 | 569.2644 | -0.3 | 2 |
| 89 | 9.99E+06 | 1096.5916 | KYKGFTPSLG | 22.32 | 4830 | 549.3018 | 0.0  | 2 |
| 76 | 4.98E+07 | 1099.5298 | FVHQLSDTPG | 22.37 | 4849 | 550.7711 | 0.3  | 2 |
| 95 | 3.05E+07 | 1142.4451 | PGMQWEHSDG | 22.37 | 4851 | 572.2283 | -0.4 | 2 |
| 81 | 3.99E+07 | 1114.5017 | HAMVFGHYPG | 22.54 | 4926 | 558.2561 | -1.4 | 2 |
| 94 | 1.12E+07 | 1164.52   | KTHQDEFQFG | 22.57 | 4941 | 583.2654 | -1.0 | 2 |
| 95 | 6.87E+06 | 1192.5513 | KQFSFVDEHG | 22.58 | 4945 | 597.2813 | -0.5 | 2 |
| 96 | 5.20E+07 | 1101.5608 | FAKVPEHAFG | 22.6  | 4954 | 368.1932 | -0.4 | 3 |
| 95 | 8.63E+06 | 1254.5525 | HTMTKTMWYG | 22.6  | 4956 | 628.2821 | -0.1 | 2 |
| 86 | 7.52E+06 | 1041.5464 | MVHVKGALG  | 22.64 | 4973 | 521.7791 | -0.4 | 2 |
| 62 | 3.16E+05 | 1049.5142 | LQLADEHAPG | 22.69 | 4993 | 525.7632 | 0.0  | 2 |
| 72 | 3.92E+07 | 1049.4565 | HAWADAPEPG | 22.78 | 5031 | 525.7342 | -0.4 | 2 |

|    |          |           |             |       |      |          |      |   |
|----|----------|-----------|-------------|-------|------|----------|------|---|
| 79 | 6.23E+06 | 1150.4966 | DTWEPTKAMG  | 22.79 | 5038 | 576.2535 | -1.4 | 2 |
| 93 | 2.70E+07 | 1139.5134 | PYDYDVPSKG  | 22.83 | 5053 | 570.7624 | -0.6 | 2 |
| 78 | 1.77E+07 | 1013.5757 | LAPVKTDTLG  | 22.84 | 5057 | 507.7937 | -0.7 | 2 |
| 89 | 3.02E+06 | 1273.5649 | FQKQDEMYLG  | 22.95 | 5109 | 637.788  | -0.6 | 2 |
| 95 | 2.49E+06 | 1219.5444 | WGMVDQKYHG  | 23.1  | 5172 | 610.7779 | -0.4 | 2 |
| 94 | 6.35E+07 | 1087.5371 | PAMVKEPYPG  | 23.1  | 5174 | 544.7745 | -0.2 | 2 |
| 87 | 1.20E+06 | 1139.5798 | WSKGFVMTKG  | 23.11 | 5176 | 380.8659 | -1.2 | 3 |
| 93 | 2.56E+06 | 1247.6121 | WVKEWGKQMG  | 23.11 | 5178 | 624.8118 | -0.2 | 2 |
| 83 | 3.80E+06 | 1095.5825 | LSWGKALQHG  | 23.14 | 5189 | 548.7972 | -0.3 | 2 |
| 97 | 1.67E+07 | 1104.5308 | PQMVMTKVDG  | 23.17 | 5200 | 553.2712 | -0.4 | 2 |
| 86 | 2.02E+06 | 1238.5503 | MTWELQHTHG  | 23.17 | 5204 | 413.856  | -1.1 | 3 |
| 97 | 4.58E+06 | 986.4457  | PTDGLGHSFG  | 23.24 | 5235 | 494.2289 | -0.4 | 2 |
| 95 | 1.21E+07 | 1128.6292 | HVFTKSLQLG  | 23.25 | 5241 | 565.3206 | -0.1 | 2 |
| 62 | 9.91E+06 | 1046.4126 | HEFGPSDAMG  | 23.28 | 5254 | 524.2125 | 0.1  | 2 |
| 89 | 1.52E+07 | 1094.4922 | MQMSPVKSMG  | 23.39 | 5298 | 548.252  | -0.3 | 2 |
| 91 | 2.63E+07 | 1014.477  | DAPSKAPSWG  | 23.43 | 5317 | 508.2445 | -0.3 | 2 |
| 76 | 3.70E+06 | 1160.4622 | DYPSHEDELG  | 23.47 | 5337 | 581.2369 | -0.3 | 2 |
| 86 | 3.95E+07 | 1126.4832 | PGWYHADQPG  | 23.48 | 5342 | 564.2471 | -0.9 | 2 |
| 94 | 1.14E+06 | 1224.5386 | MYKSWGPHYHG | 23.49 | 5348 | 613.2745 | -1.2 | 2 |
| 91 | 1.52E+05 | 1073.4778 | LQDYDGLGHG  | 23.56 | 5401 | 537.7463 | 2.4  | 2 |
| 58 | 2.10E+07 | 1062.4077 | MEHGDSPSFG  | 23.51 | 5353 | 532.2096 | -0.7 | 2 |
| 97 | 3.60E+06 | 1158.5823 | FVWSHGKELG  | 23.67 | 5424 | 580.2966 | -0.9 | 2 |
| 82 | 6.53E+06 | 1187.645  | KVKQPAFQWG  | 23.7  | 5436 | 594.8281 | -0.6 | 2 |
| 93 | 2.18E+07 | 1227.5308 | WTHYDVDVHG  | 23.71 | 5443 | 410.1829 | -0.9 | 3 |
| 91 | 4.92E+07 | 1126.5691 | MELEKQVPPG  | 23.76 | 5462 | 564.2903 | -0.5 | 2 |
| 87 | 3.35E+06 | 1121.5327 | FVKGWGMQPG  | 23.79 | 5478 | 561.7724 | 0.0  | 2 |
| 56 | 1.31E+07 | 1212.5928 | KVHYPEWTPG  | 23.95 | 5546 | 607.3022 | -0.2 | 2 |
| 96 | 1.50E+06 | 1183.6602 | LQLYFTKSKG  | 24.02 | 5577 | 592.8356 | -0.7 | 2 |
| 91 | 2.10E+06 | 1216.4529 | MYMAHTDEFG  | 24.04 | 5585 | 609.2317 | -1.1 | 2 |
| 79 | 1.26E+07 | 1171.5232 | HYHGPFVQMG  | 24.06 | 5596 | 586.7672 | -0.6 | 2 |
| 96 | 8.57E+06 | 1098.582  | KQFGLELAHG  | 24.08 | 5606 | 550.2966 | -0.8 | 2 |
| 80 | 5.94E+06 | 1189.5703 | MAHYKGWQLG  | 24.21 | 5659 | 595.7906 | -0.9 | 2 |
| 98 | 1.22E+07 | 1077.4993 | DTHVLGHGWG  | 24.26 | 5678 | 539.7555 | -0.4 | 2 |
| 90 | 4.23E+07 | 1115.561  | HSLGKEFELG  | 24.26 | 5680 | 558.7863 | -0.4 | 2 |
| 95 | 3.21E+07 | 1220.5825 | LQKQPYWSDG  | 24.27 | 5684 | 611.2967 | -0.8 | 2 |
| 93 | 7.90E+06 | 1205.511  | HQMGHVIFYMG | 24.34 | 5718 | 603.7612 | -0.4 | 2 |
| 95 | 5.41E+06 | 1121.6055 | FVKGMVKAWG  | 24.48 | 5780 | 374.8744 | -1.6 | 3 |
| 91 | 8.02E+06 | 1148.5979 | KEHTWVPVPG  | 24.49 | 5787 | 575.3043 | -1.1 | 2 |
| 90 | 3.64E+06 | 1294.6094 | WEKVWEPQHG  | 24.5  | 5789 | 648.31   | -0.8 | 2 |
| 73 | 4.69E+07 | 1009.5345 | PGLAKGWQPG  | 24.56 | 5816 | 505.773  | -0.7 | 2 |
| 84 | 4.84E+05 | 1079.5288 | PGDAPYLYKG  | 24.56 | 5818 | 540.7704 | -0.2 | 2 |



|    |          |           |            |       |      |          |      |   |
|----|----------|-----------|------------|-------|------|----------|------|---|
| 74 | 4.21E+06 | 1188.5022 | MTPYPGWQHG | 24.63 | 5848 | 595.2568 | -0.4 | 2 |
| 93 | 8.41E+06 | 1073.46   | WADALGHTMG | 24.66 | 5863 | 537.7355 | -1.0 | 2 |
| 92 | 1.01E+07 | 1163.5645 | KEKGLEMSWG | 24.67 | 5867 | 582.7878 | -0.8 | 2 |
| 94 | 1.22E+07 | 1118.4087 | DSDQMSHGWG | 24.72 | 5886 | 560.21   | -0.7 | 2 |
| 95 | 5.94E+07 | 1011.5389 | KAPAPEPVFG | 24.86 | 5947 | 506.7754 | -0.5 | 2 |
| 93 | 6.40E+06 | 1069.4651 | WVDTHAPGMG | 24.91 | 5968 | 535.7384 | -0.4 | 2 |
| 69 | 2.54E+06 | 1137.5818 | WGDTKTFVKG | 24.94 | 5984 | 380.2001 | -0.8 | 3 |
| 98 | 2.71E+06 | 1159.6389 | PVIFYHVKTG | 24.95 | 5987 | 580.8253 | -0.2 | 2 |
| 85 | 1.01E+07 | 1163.5532 | LYPEPEMTKG | 24.96 | 5991 | 582.7825 | -0.2 | 2 |
| 93 | 1.26E+06 | 1226.5212 | KTHSWSMYMG | 24.96 | 5993 | 614.2657 | -1.3 | 2 |
| 61 | 2.89E+07 | 1133.4812 | MSHVFQDVG  | 25.01 | 6014 | 567.7449 | -3.0 | 2 |
| 95 | 2.31E+06 | 1204.6128 | LSFYKSFEKG | 25.1  | 6050 | 603.312  | -0.7 | 2 |
| 89 | 3.03E+06 | 1236.5789 | WQFQLQHG   | 25.16 | 6077 | 619.2949 | -0.7 | 2 |
| 59 | 6.03E+05 | 1176.542  | FQHAMVMQLG | 25.19 | 6092 | 589.2762 | -1.3 | 2 |
| 90 | 4.39E+06 | 1078.5481 | MQPSLTFAGK | 25.35 | 6157 | 540.2797 | -0.9 | 2 |
| 84 | 1.96E+06 | 1154.4736 | DQPEMGKYM  | 25.37 | 6167 | 578.2424 | -0.8 | 2 |
| 90 | 3.75E+06 | 1248.5444 | DEMCKYLEHG | 25.41 | 6184 | 625.2773 | -1.3 | 2 |
| 91 | 1.14E+07 | 1234.4746 | MEHTWQMTDG | 25.41 | 6186 | 618.2424 | -1.3 | 2 |
| 87 | 7.63E+06 | 1105.5557 | HAFKSLFEG  | 25.45 | 6203 | 553.7834 | -0.9 | 2 |
| 96 | 4.35E+06 | 1110.5823 | KTLGDVWVHG | 25.46 | 6205 | 556.2963 | -1.7 | 2 |
| 72 | 4.32E+06 | 1131.502  | DYHQPVLMG  | 25.48 | 6214 | 566.7563 | -1.2 | 2 |
| 94 | 1.62E+07 | 1082.4524 | DGKYPQMG   | 25.53 | 6237 | 542.2319 | -0.8 | 2 |
| 85 | 2.89E+06 | 1276.5217 | LQHTMEWEM  | 25.54 | 6243 | 639.2663 | -0.7 | 2 |
| 87 | 3.26E+06 | 1077.543  | FAMVKAFAG  | 25.56 | 6252 | 360.1868 | -2.0 | 3 |
| 97 | 1.78E+06 | 1259.5723 | PAKYWEWSHG | 25.66 | 6296 | 630.7915 | -0.8 | 2 |
| 84 | 2.09E+06 | 1213.5007 | WQMEMAPQHG | 25.71 | 6315 | 607.756  | -0.5 | 2 |
| 96 | 2.00E+07 | 1167.4656 | FQDVHGMVDG | 25.74 | 6328 | 584.7381 | -1.2 | 2 |
| 93 | 7.12E+05 | 1195.606  | WADVKKVMYK | 25.81 | 6359 | 598.8085 | -0.7 | 2 |
| 95 | 4.69E+07 | 1191.5671 | HVWEDVHTLG | 25.87 | 6386 | 596.7892 | -0.5 | 2 |
| 87 | 1.56E+07 | 1203.5496 | HAHQMTFYLG | 26.05 | 6462 | 602.78   | -1.3 | 2 |
| 92 | 2.38E+07 | 1206.5679 | MVMYHVWVGK | 26.14 | 6498 | 403.195  | -1.6 | 3 |
| 96 | 2.83E+07 | 1154.4736 | MTDEMSWAKG | 26.14 | 6500 | 578.2423 | -0.9 | 2 |
| 95 | 1.82E+07 | 1245.5779 | KVDYDQWVHG | 26.15 | 6506 | 623.7944 | -0.8 | 2 |
| 97 | 4.62E+06 | 1238.5906 | WAHYMYKALG | 26.18 | 6519 | 620.3003 | -1.5 | 2 |
| 95 | 6.61E+06 | 1119.6077 | FVLGWGKEKG | 26.31 | 6573 | 560.8089 | -1.7 | 2 |
| 73 | 3.61E+07 | 1180.4971 | HQMEWAPEPG | 26.36 | 6592 | 591.2535 | -1.6 | 2 |
| 94 | 7.87E+06 | 1204.6028 | WAHYKAPYLG | 26.4  | 6611 | 603.3064 | -1.6 | 2 |
| 66 | 2.54E+06 | 1138.5515 | MQKYLGMVPG | 26.46 | 6640 | 570.2809 | -1.6 | 2 |
| 95 | 7.52E+06 | 1160.5801 | MGHAKVWYLG | 26.48 | 6648 | 581.2952 | -1.4 | 2 |
| 94 | 5.70E+07 | 1108.446  | FGDYLEHGDG | 26.61 | 6707 | 555.2288 | -0.6 | 2 |
| 97 | 5.30E+06 | 1266.614  | MTKVYFYMG  | 26.73 | 6758 | 634.3123 | -1.0 | 2 |

|    |          |           |            |       |      |          |      |   |
|----|----------|-----------|------------|-------|------|----------|------|---|
| 92 | 2.66E+07 | 1247.5459 | FQDYDTKQFG | 26.79 | 6779 | 624.7781 | -1.2 | 2 |
| 98 | 3.37E+06 | 1149.6182 | LTFTLAHYKG | 26.91 | 6833 | 575.8141 | -1.8 | 2 |
| 80 |          | 1039.4974 | PAKSDAFTFG | 26.94 | 6846 | 520.7542 | -1.2 | 2 |
| 87 | 1.12E+07 | 1225.613  | FEKYHGLYLG | 27.03 | 6886 | 613.8114 | -1.7 | 2 |
| 85 | 1.44E+05 | 1273.6455 | HQLTLYWEKG | 27.1  | 6915 | 637.8273 | -2.0 | 2 |
| 96 | 2.76E+07 | 1071.4509 | DSDSPGKYFG | 27.15 | 6937 | 536.7307 | -1.6 | 2 |
| 97 | 2.37E+07 | 1105.5049 | PAMQMTWGKG | 27.2  | 6960 | 553.7578 | -1.4 | 2 |
| 97 | 5.13E+06 | 1147.5042 | PTFYMSMSKG | 27.2  | 6962 | 574.7569 | -2.1 | 2 |
| 92 | 6.67E+06 | 1210.5442 | FTMAKQDQWG | 27.21 | 6964 | 606.2768 | -2.1 | 2 |
| 58 | 1.50E+07 | 1124.5073 | WAHGLEPQMG | 27.31 | 7011 | 563.2594 | -0.5 | 2 |
| 88 | 1.84E+07 | 1094.5032 | PTFSDTWGKG | 27.32 | 7013 | 548.2575 | -0.3 | 2 |
| 45 | 4.09E+05 | 1062.5281 | HVPGMVHTLG | 27.33 | 7019 | 532.2682 | -3.7 | 2 |
| 81 | 4.26E+07 | 1143.5195 | DQDTHVLYPG | 27.36 | 7032 | 572.7654 | -0.7 | 2 |
| 95 | 2.23E+07 | 1189.5801 | HYKVLQVMG  | 27.47 | 7080 | 595.7959 | -0.2 | 2 |
| 92 | 5.62E+06 | 1022.4379 | PVFTDGPSMG | 27.55 | 7112 | 512.2247 | -0.8 | 2 |
| 87 | 2.34E+07 | 1078.4753 | KVDGMTWADG | 27.59 | 7131 | 540.2438 | 0.1  | 2 |
| 92 | 2.67E+07 | 1139.5071 | MTPSPEHVWG | 27.7  | 7175 | 570.7593 | -0.4 | 2 |
| 96 | 1.31E+07 | 1037.5029 | DSLVSFKADG | 27.71 | 7181 | 519.7573 | -0.6 | 2 |
| 95 | 2.95E+07 | 1252.6353 | HVLAWQWEKG | 27.8  | 7219 | 627.3231 | -0.7 | 2 |
| 71 | 3.49E+06 | 987.3934  | PSDSWADGPG | 27.8  | 7221 | 494.7026 | -0.6 | 2 |
| 51 | 2.99E+05 | 1045.5444 | KVFADAPELG | 27.83 | 7233 | 523.7778 | -1.1 | 2 |
| 86 | 1.83E+07 | 1094.5244 | DAKQFTLTDG | 27.87 | 7248 | 548.2679 | -0.7 | 2 |
| 91 | 2.11E+07 | 1126.439  | MEHTFSDGFG | 28.01 | 7307 | 564.2253 | -0.4 | 2 |
| 70 | 1.28E+06 | 1134.5015 | WTDEPTKAMG | 28.01 | 7311 | 568.2568 | 0.0  | 2 |
| 95 | 1.09E+06 | 1058.522  | LEWGMAKAPG | 28.11 | 7351 | 530.2667 | -0.7 | 2 |
| 75 | 1.52E+06 | 1111.4678 | FSPTMTPQMG | 28.13 | 7361 | 556.7391 | -1.6 | 2 |
| 96 | 1.37E+06 | 1278.5737 | LEKQWEMQMG | 28.2  | 7394 | 640.2921 | -1.0 | 2 |
| 93 | 1.31E+07 | 1142.478  | WTWGHTPSDG | 28.21 | 7399 | 572.2448 | -0.4 | 2 |
| 84 | 2.23E+06 | 1262.4949 | KSDTWEMYMG | 28.24 | 7413 | 632.2526 | -1.2 | 2 |
| 95 | 4.25E+07 | 1028.4749 | FGDVHVMPAG | 28.26 | 7420 | 515.2433 | -0.6 | 2 |
| 65 | 2.75E+07 | 1213.4929 | WQMEMAMSKG | 28.27 | 7424 | 607.7564 | 6.6  | 2 |
| 64 | 9.42E+06 | 1199.5876 | KGHVWYWAPG | 28.38 | 7471 | 600.7993 | -0.9 | 2 |
| 97 | 6.89E+07 | 1107.5601 | PGDVPYLYKG | 28.58 | 7555 | 554.7855 | -1.1 | 2 |
| 97 | 3.91E+07 | 942.4559  | FGDGLGLAHG | 28.58 | 7557 | 472.2334 | -1.6 | 2 |
| 94 | 5.18E+06 | 1215.6035 | KAHEFTLQWG | 28.59 | 7563 | 608.8071 | -1.0 | 2 |
| 83 | 4.09E+07 | 1232.5496 | MELQDQHLYG | 28.67 | 7595 | 617.2803 | -0.6 | 2 |
| 96 | 2.82E+07 | 1060.4319 | DGMTMVHVDG | 28.72 | 7618 | 531.2218 | -0.5 | 2 |
| 95 | 3.49E+07 | 1084.4824 | DELAFEHAPG | 28.74 | 7628 | 543.2471 | -0.3 | 2 |
| 94 | 6.65E+06 | 1100.5039 | DVFGFSHVHG | 28.77 | 7639 | 551.2579 | -0.3 | 2 |
| 93 | 7.30E+06 | 1292.5859 | KEHEMYLTWG | 28.79 | 7651 | 647.2987 | -0.2 | 2 |
| 92 | 8.31E+06 | 1249.4709 | MSWEDYPEHG | 28.83 | 7666 | 625.7408 | -0.9 | 2 |

|    |          |           |             |       |      |          |      |   |
|----|----------|-----------|-------------|-------|------|----------|------|---|
| 90 | 5.01E+07 | 1235.5498 | FSPYPYKYDG  | 28.87 | 7685 | 618.7805 | -0.6 | 2 |
| 95 | 1.28E+07 | 1057.5015 | PTLGMQFAHG  | 28.88 | 7687 | 529.7571 | 0.4  | 2 |
| 96 | 1.03E+07 | 1308.6501 | WVKEFEKTWG  | 28.88 | 7689 | 655.3306 | -0.4 | 2 |
| 93 | 2.93E+07 | 1145.4778 | PEFGDTWTHG  | 28.88 | 7691 | 573.7449 | 0.0  | 2 |
| 96 | 5.34E+06 | 1213.5073 | MSWSFEDQKG  | 28.88 | 7693 | 607.7593 | -0.5 | 2 |
| 90 | 1.44E+06 | 1155.502  | WSKQMAFSDG  | 28.89 | 7697 | 578.7568 | -0.3 | 2 |
| 91 | 5.41E+06 | 1201.5591 | KSMVFSFYHG  | 29.05 | 7767 | 601.7852 | -0.5 | 2 |
| 97 | 2.50E+07 | 1148.5867 | PTLSPYKTWG  | 29.06 | 7769 | 575.299  | -0.7 | 2 |
| 59 | 3.67E+07 | 1138.5229 | MEHQPALAWG  | 29.06 | 7773 | 570.2678 | 0.6  | 2 |
| 95 | 4.30E+07 | 1113.5818 | WQLVDAKTPG  | 29.21 | 7835 | 557.7965 | -0.8 | 2 |
| 62 | 2.30E+05 | 956.4716  | FADGLGLAHG  | 29.25 | 7856 | 479.2403 | -3.6 | 2 |
| 55 | 2.27E+05 | 1192.4463 | MEHQMGMAWG  | 29.26 | 7860 | 597.2277 | -2.4 | 2 |
| 96 | 3.11E+06 | 1195.5332 | WSMADTKVWG  | 29.37 | 7905 | 598.7722 | -0.7 | 2 |
| 44 | 5.73E+06 | 1028.4749 | FGLAHEMAPG  | 29.73 | 8056 | 515.2419 | -3.3 | 2 |
| 97 | 6.25E+06 | 1353.6541 | MEWQKVWYKG  | 29.78 | 8075 | 677.8322 | -0.9 | 2 |
| 93 | 9.48E+06 | 1092.5452 | DQKTPTFSLG  | 29.8  | 8082 | 547.2783 | -0.7 | 2 |
| 61 | 1.86E+06 | 1133.4778 | HGPYFQDVDG  | 29.84 | 8103 | 567.7451 | 0.2  | 2 |
| 65 | 2.60E+06 | 1118.5278 | MTDQLQPTLG  | 29.89 | 8122 | 560.2695 | -0.9 | 2 |
| 58 | 1.17E+05 | 1222.6169 | PSMQKVWYKG  | 29.89 | 8124 | 612.3124 | -3.2 | 2 |
| 97 | 9.93E+06 | 1334.572  | KGWYHYDYFG  | 29.99 | 8166 | 668.2911 | -1.0 | 2 |
| 81 | 7.82E+05 | 1055.5037 | HALTLSWGDG  | 30.06 | 8196 | 528.7576 | -0.7 | 2 |
| 56 | 1.37E+07 | 1033.4209 | PADQMVDAMG  | 30.25 | 8274 | 517.7159 | -1.4 | 2 |
| 96 | 1.38E+06 | 1128.5386 | WSLSLQHAMG  | 30.26 | 8282 | 565.2745 | -1.5 | 2 |
| 59 | 3.68E+07 | 955.5524  | KGLAPAMVLG  | 30.31 | 8299 | 478.782  | -0.9 | 2 |
| 89 | 6.23E+05 | 1277.5386 | KQDTFSWYMG  | 30.32 | 8307 | 639.7744 | -1.3 | 2 |
| 89 | 3.14E+07 | 1268.5396 | WAMQHQP EWG | 30.36 | 8320 | 635.2755 | -0.2 | 2 |
| 95 | 4.47E+06 | 1308.6138 | WEFYLTKEHG  | 30.37 | 8326 | 655.3122 | -0.8 | 2 |
| 43 | 7.22E+06 | 1062.4363 | PEMTMSPVDG  | 30.46 | 8364 | 532.2242 | -0.1 | 2 |
| 95 | 3.61E+07 | 1198.5295 | FSDTPYHYLG  | 30.51 | 8389 | 600.2705 | -0.4 | 2 |
| 72 | 4.96E+06 | 1143.4656 | WQMOPGPE DG | 30.52 | 8391 | 572.7384 | -0.7 | 2 |
| 96 | 1.21E+07 | 1172.5979 | DVLGWYHVKG  | 30.63 | 8439 | 587.3048 | -0.2 | 2 |
| 95 | 2.29E+06 | 1193.554  | LAWTMGKEWG  | 30.7  | 8469 | 597.7824 | -0.9 | 2 |
| 98 | 2.97E+06 | 1152.5671 | MVMTLTKAWG  | 30.72 | 8480 | 577.2889 | -1.1 | 2 |
| 95 | 3.07E+07 | 1025.5181 | FALADSKAFG  | 30.74 | 8488 | 513.7645 | -1.4 | 2 |
| 98 | 4.99E+07 | 1176.5815 | LYWEPKVDG   | 30.77 | 8501 | 589.2961 | -1.0 | 2 |
| 93 | 2.66E+05 | 978.5498  | PGLTLTLAHG  | 30.8  | 8511 | 490.2802 | -1.9 | 2 |
| 78 | 1.43E+06 | 1222.5229 | FQPAHSWYMG  | 30.86 | 8536 | 612.2665 | -1.5 | 2 |
| 82 | 7.49E+05 | 1129.4749 | DGKYMEPSFG  | 30.87 | 8542 | 565.7429 | -1.0 | 2 |
| 83 | 4.32E+07 | 1111.5701 | LYPAFGPYKG  | 30.88 | 8545 | 556.7906 | -0.8 | 2 |
| 71 | 2.74E+07 | 1122.5566 | KQMYLGMVPG  | 30.88 | 8547 | 562.2838 | -1.1 | 2 |
| 69 | 4.37E+07 | 1185.5454 | WAHYPVDELG  | 31.01 | 8608 | 593.7782 | -0.8 | 2 |

|    |          |           |            |       |      |          |      |   |
|----|----------|-----------|------------|-------|------|----------|------|---|
| 96 | 2.03E+07 | 1043.5076 | FGFGPSKTFG | 31.1  | 8642 | 522.7596 | -0.5 | 2 |
| 86 | 1.53E+07 | 1081.4539 | FYMQPGPADG | 31.11 | 8646 | 541.7332 | 0.4  | 2 |
| 96 | 6.10E+06 | 1147.5371 | MSFYFAKTPG | 31.17 | 8674 | 574.7742 | -0.7 | 2 |
| 61 | 4.27E+06 | 1198.533  | FSDTWVQLG  | 31.35 | 8749 | 600.2701 | -3.8 | 2 |
| 87 | 2.95E+07 | 1103.5037 | WTDTHGLAFG | 31.49 | 8806 | 552.7576 | -0.5 | 2 |
| 97 | 2.66E+07 | 1152.5273 | FSWTKAMEPG | 31.51 | 8817 | 577.2696 | -0.2 | 2 |
| 95 | 2.63E+07 | 1129.5115 | MTDGFEFVKG | 31.52 | 8819 | 565.7614 | -0.6 | 2 |
| 89 | 4.74E+07 | 1183.5549 | KYFEFEPAPG | 31.57 | 8844 | 592.7832 | -0.4 | 2 |
| 92 | 7.48E+06 | 1291.635  | LQKQWYPSWG | 31.61 | 8859 | 646.8231 | -0.5 | 2 |
| 92 | 1.50E+06 | 1370.6196 | FYWYWGKQHG | 31.62 | 8865 | 686.3147 | -1.3 | 2 |
| 81 | 4.80E+06 | 1300.5183 | DQFYHTWTMG | 31.63 | 8867 | 651.2646 | -0.5 | 2 |
| 97 | 2.62E+07 | 1156.5188 | WTKAFGDEFG | 31.7  | 8899 | 579.2654 | 0.1  | 2 |
| 68 | 4.60E+06 | 1055.5435 | HSLGLQLTMG | 31.71 | 8903 | 528.7775 | -0.6 | 2 |
| 94 | 2.56E+07 | 1087.458  | WGMGMEHALG | 31.79 | 8938 | 544.7349 | -0.3 | 2 |
| 95 | 1.76E+07 | 1111.4944 | FAMQWGMGKG | 31.97 | 9011 | 556.7529 | -0.7 | 2 |
| 84 | 1.25E+07 | 1086.5862 | WVPAPVKSG  | 32    | 9024 | 544.2989 | -0.5 | 2 |
| 97 | 2.81E+07 | 1271.5679 | LYWEMQKSMG | 32.07 | 9058 | 636.7894 | -0.6 | 2 |
| 59 | 1.13E+07 | 1142.4814 | HSDSWVPQMG | 32.14 | 9087 | 572.246  | -1.3 | 2 |
| 95 | 3.04E+07 | 1231.541  | FVHTWGWQDG | 32.22 | 9121 | 616.7757 | -1.2 | 2 |
| 58 | 4.91E+05 | 1118.4153 | DQDADEWSPG | 32.23 | 9123 | 560.2129 | -1.4 | 2 |
| 95 | 1.04E+07 | 1250.572  | WVHQFSLYDG | 32.25 | 9134 | 626.2913 | -1.0 | 2 |
| 91 | 1.17E+06 | 1076.5688 | KVPSLQMAFG | 32.26 | 9136 | 539.29   | -1.0 | 2 |
| 93 | 1.19E+07 | 1186.5659 | FQPSDYKVFG | 32.3  | 9153 | 594.2887 | -0.4 | 2 |
| 90 | 1.42E+06 | 1339.635  | WQKTPYQWFG | 32.42 | 9207 | 670.8228 | -0.7 | 2 |
| 96 | 3.34E+07 | 1134.5896 | LAKAPVMYWG | 32.43 | 9209 | 568.3005 | -0.6 | 2 |
| 62 | 2.44E+06 | 1094.4712 | MGHVMAMVFG | 32.45 | 9216 | 548.2415 | -0.3 | 2 |
| 96 | 5.77E+06 | 1284.604  | KSWAHVWEWG | 32.45 | 9218 | 643.3076 | -0.5 | 2 |
| 79 | 1.47E+06 | 1012.3664 | DSPGMSMTMG | 32.59 | 9277 | 507.1887 | -1.3 | 2 |
| 86 | 4.11E+07 | 1073.5757 | KVFADVPELG | 32.59 | 9279 | 537.7938 | -0.3 | 2 |
| 96 | 9.84E+06 | 1131.4841 | MSMAVHVVDG | 32.64 | 9298 | 566.7474 | -1.3 | 2 |
| 53 | 4.21E+07 | 1097.5505 | DGHQPVLVYG | 32.64 | 9300 | 549.7812 | -0.3 | 2 |
| 60 | 1.37E+06 | 1049.4521 | DGMQPVLSMG | 32.65 | 9308 | 525.732  | -0.4 | 2 |
| 97 | 2.31E+07 | 1091.4495 | FGMGDSHVWG | 32.68 | 9319 | 546.7307 | -0.2 | 2 |
| 63 | 1.77E+06 | 1213.4675 | HQDGFIFYDG | 32.84 | 9386 | 607.7395 | -0.3 | 2 |
| 84 | 1.68E+07 | 1002.4658 | FALSDAPEPG | 32.94 | 9429 | 502.2389 | -0.3 | 2 |
| 71 | 6.67E+06 | 1270.5442 | FQHYMQDVFG | 32.97 | 9444 | 636.2778 | -0.2 | 2 |
| 46 | 1.72E+06 | 1081.4175 | MGPGDSPYWG | 32.99 | 9454 | 541.7148 | 0.0  | 2 |
| 89 | 1.24E+07 | 1197.5667 | KEDQFSFQLG | 33.12 | 9506 | 599.7893 | 0.0  | 2 |
| 80 | 1.68E+05 | 1138.5771 | KELGDVWVHG | 33.24 | 9560 | 570.2944 | -0.4 | 2 |
| 82 | 1.73E+06 | 1234.5442 | MQHSFTWELG | 33.26 | 9565 | 618.2778 | -0.4 | 2 |
| 83 | 3.86E+06 | 1064.4695 | LVDSLSEMDG | 33.29 | 9578 | 533.2407 | -0.3 | 2 |

|    |          |           |             |       |       |          |      |   |
|----|----------|-----------|-------------|-------|-------|----------|------|---|
| 52 | 6.80E+05 | 1113.5132 | FADAFTWSLG  | 33.38 | 9618  | 557.7645 | 3.4  | 2 |
| 95 | 8.78E+06 | 1280.6553 | KEKVWTWTFG  | 33.4  | 9625  | 641.3329 | -0.9 | 2 |
| 97 | 1.15E+07 | 1090.5811 | LGWAPYLSKG  | 33.43 | 9642  | 546.2963 | -0.5 | 2 |
| 72 | 7.96E+06 | 1122.5742 | KEMQFALS LG | 33.48 | 9678  | 562.2906 | -4.5 | 2 |
| 82 | 2.81E+06 | 1054.4277 | MVDYLADGDG  | 33.45 | 9650  | 528.2197 | -0.6 | 2 |
| 98 | 2.02E+06 | 989.5909  | LGLAFTLAKG  | 33.47 | 9659  | 495.8013 | -0.7 | 2 |
| 76 | 9.16E+06 | 1144.4495 | FADQM QFSDG | 33.55 | 9693  | 573.2299 | -1.6 | 2 |
| 84 | 1.48E+05 | 1044.5393 | LG FAPVHTFG | 33.6  | 9716  | 523.2753 | -1.0 | 2 |
| 70 | 1.08E+06 | 1127.4043 | WGDEFSDTDG  | 33.64 | 9731  | 564.708  | -0.3 | 2 |
| 98 | 3.44E+07 | 1049.5908 | FAFVKAPTLG  | 33.68 | 9747  | 525.8015 | 0.0  | 2 |
| 62 | 3.81E+05 | 1171.5298 | PTFEWEHGLG  | 33.71 | 9759  | 586.7709 | 0.0  | 2 |
| 95 | 2.27E+07 | 1379.6299 | HEFEKVWYWG  | 33.73 | 9766  | 690.8203 | -0.6 | 2 |
| 93 | 5.25E+05 | 1239.6321 | LQKSWYMLG   | 33.81 | 9801  | 620.8219 | -0.1 | 2 |
| 97 | 3.33E+06 | 1120.5342 | PTFYHGPVFG  | 33.83 | 9806  | 561.2726 | -1.0 | 2 |
| 97 | 1.26E+06 | 1191.502  | WVHAFTMEDG  | 33.84 | 9812  | 596.7565 | -0.7 | 2 |
| 69 | 6.87E+06 | 1149.5012 | PYDEMPQLG   | 33.91 | 9842  | 575.756  | -1.0 | 2 |
| 95 | 2.43E+06 | 1158.5708 | LQFEFGFSKG  | 33.93 | 9850  | 580.2909 | -0.9 | 2 |
| 93 | 2.98E+06 | 1015.5702 | KVFALAPVDG  | 33.93 | 9852  | 508.7908 | -0.8 | 2 |
| 93 | 1.53E+06 | 1235.5203 | DYLYKEMSMG  | 33.94 | 9857  | 618.7656 | -0.7 | 2 |
| 66 | 8.38E+05 | 1200.5928 | KGPTLQWEWG  | 33.95 | 9861  | 601.3022 | -0.3 | 2 |
| 95 | 1.35E+06 | 1207.6025 | PVLYFQFTHG  | 33.97 | 9871  | 604.8069 | -0.4 | 2 |
| 63 | 2.13E+06 | 1051.4314 | MSLQDVDGGMG | 33.99 | 9877  | 526.7215 | -0.6 | 2 |
| 77 | 3.67E+06 | 1177.5557 | LAWTHSFYPG  | 34.03 | 9893  | 589.7842 | 0.6  | 2 |
| 94 | 1.02E+07 | 1202.5759 | FYWTPSFAKG  | 34.06 | 9906  | 602.2936 | -0.5 | 2 |
| 73 | 3.34E+07 | 1221.6182 | KTPVWYFQPG  | 34.1  | 9924  | 611.8148 | -0.3 | 2 |
| 87 | 1.89E+07 | 1105.4465 | DGDSWGHYLG  | 34.17 | 9951  | 553.7292 | -0.1 | 2 |
| 95 | 3.35E+06 | 1102.5447 | LG FEPVHTFG | 34.22 | 9974  | 552.2784 | 0.0  | 2 |
| 32 | 1.52E+06 | 1178.543  | LAWTPQMYPG  | 34.27 | 9994  | 590.2753 | -3.7 | 2 |
| 83 | 3.28E+05 | 1116.429  | FVMAMEMADG  | 34.3  | 10005 | 559.2201 | -0.8 | 2 |
| 92 | 1.17E+06 | 1275.5515 | MYKEMEFELG  | 34.31 | 10009 | 638.7813 | -0.5 | 2 |
| 78 | 1.61E+06 | 982.3702  | DGDTFSMGPG  | 34.53 | 10097 | 492.191  | -0.6 | 2 |
| 88 | 2.12E+07 | 1171.5947 | KVMVFYDTLG  | 34.6  | 10121 | 586.803  | -0.6 | 2 |
| 57 | 1.57E+06 | 1280.5649 | WSHSWYLVMG  | 34.7  | 10164 | 641.2866 | -2.7 | 2 |
| 82 | 2.92E+07 | 1256.5898 | MEKYLAPYWG  | 34.83 | 10213 | 629.3001 | -1.1 | 2 |
| 73 | 7.68E+05 | 1161.4946 | MAPTMQWQPG  | 34.9  | 10246 | 581.7528 | -0.9 | 2 |
| 92 | 2.83E+07 | 1178.5793 | PGKVM EWYLG | 34.91 | 10251 | 590.2955 | -0.2 | 2 |
| 97 | 3.67E+07 | 1262.6084 | PGWYLQKEWG  | 34.96 | 10269 | 632.3101 | 0.1  | 2 |
| 64 | 3.72E+05 | 1164.4216 | HEDYPEMGMG  | 35.05 | 10310 | 583.22   | 5.4  | 2 |
| 86 | 1.17E+07 | 1175.532  | KEPAMYFSFG  | 35.13 | 10340 | 588.7717 | -0.4 | 2 |
| 97 | 8.36E+06 | 1149.5276 | LSWVMSHSFG  | 35.21 | 10377 | 575.7693 | -0.8 | 2 |
| 98 | 5.39E+06 | 1138.5845 | LSWALAMYKG  | 35.22 | 10379 | 570.2979 | -0.7 | 2 |

|    |          |           |            |       |       |          |      |   |
|----|----------|-----------|------------|-------|-------|----------|------|---|
| 95 | 8.18E+06 | 1133.5505 | DVPSWQKAFG | 35.27 | 10398 | 567.7808 | -0.9 | 2 |
| 61 | 1.43E+05 | 1191.5747 | LAWTMAKEWG | 35.34 | 10426 | 596.7928 | -0.8 | 2 |
| 97 | 8.57E+05 | 1156.541  | FTMSMAKVWG | 35.37 | 10434 | 579.2761 | -0.8 | 2 |
| 97 | 1.62E+07 | 1269.4939 | DYDTWVHYDG | 35.44 | 10458 | 635.7522 | -1.0 | 2 |
| 86 | 7.43E+06 | 1121.5293 | FGHTLAFSWG | 35.56 | 10506 | 561.7703 | -0.7 | 2 |
| 84 | 1.73E+07 | 1221.6182 | WYPTKALTWG | 35.63 | 10531 | 611.8147 | -0.5 | 2 |
| 61 | 1.00E+07 | 996.524   | DSHSLVLGLG | 35.63 | 10533 | 499.2681 | -0.1 | 2 |
| 66 | 8.29E+06 | 1161.4946 | PSMTMQWQPG | 35.65 | 10540 | 581.7527 | -1.0 | 2 |
| 62 | 5.61E+05 | 1276.5256 | PYPYMQMQFG | 35.68 | 10556 | 639.2686 | -0.1 | 2 |
| 72 | 2.71E+07 | 1225.5515 | HQLVWGDEWG | 35.69 | 10559 | 613.7806 | -1.7 | 2 |
| 89 | 2.44E+07 | 1186.5771 | LGLEHTWQFG | 35.7  | 10562 | 594.2941 | -0.8 | 2 |
| 96 | 1.63E+07 | 1180.6279 | FYLAKTPVWG | 35.76 | 10588 | 591.3196 | -0.6 | 2 |
| 94 | 1.06E+06 | 1220.5688 | FYKAWVFGMG | 35.84 | 10620 | 611.2897 | -1.1 | 2 |
| 76 | 4.40E+06 | 1022.4742 | FVDSPTLGMG | 36    | 10675 | 512.2424 | -1.6 | 2 |
| 63 | 2.22E+05 | 1217.5427 | FSPYPYKEMG | 36.02 | 10686 | 609.7745 | -4.6 | 2 |
| 95 | 1.22E+07 | 1269.5488 | WTKEWGMEFG | 36.11 | 10721 | 635.7798 | -0.7 | 2 |
| 78 | 6.87E+05 | 968.3909  | MSLAFGDGDG | 36.14 | 10733 | 485.2013 | -0.8 | 2 |
| 84 | 3.13E+06 | 1105.4961 | LSLEMQDVDG | 36.17 | 10742 | 553.7539 | -0.4 | 2 |
| 96 | 1.69E+07 | 1178.5608 | WELVFGKEDG | 36.24 | 10772 | 590.2858 | -0.9 | 2 |
| 63 | 3.10E+05 | 1185.5488 | WEHTMVLVDG | 36.42 | 10837 | 593.7781 | -3.9 | 2 |
| 65 | 2.89E+05 | 1002.5021 | PSPALYLADG | 36.58 | 10890 | 502.2566 | -1.3 | 2 |
| 95 | 3.52E+06 | 1248.5928 | KAPEWQFTWG | 36.7  | 10926 | 625.3009 | -2.2 | 2 |
| 80 | 6.73E+06 | 1009.5233 | WSPSPAPVLG | 36.74 | 10941 | 505.7673 | -0.9 | 2 |
| 92 | 8.05E+06 | 1229.5869 | WQFYPAFSKG | 36.87 | 10991 | 615.799  | -0.6 | 2 |
| 94 | 1.17E+07 | 1182.5708 | PGKYWEFSLG | 36.88 | 10993 | 592.2913 | -0.2 | 2 |
| 70 | 1.05E+07 | 1105.4751 | DEPQPGLYMG | 37    | 11035 | 553.7433 | -0.5 | 2 |
| 97 | 3.80E+06 | 1315.551  | LSFYDEHYWG | 37.03 | 11047 | 658.7809 | -0.7 | 2 |
| 89 | 2.62E+07 | 1162.5659 | DEKVGPPYLG | 37.31 | 11124 | 582.2886 | -0.6 | 2 |
| 97 | 1.93E+07 | 1267.5332 | LEMYFGHEWG | 37.41 | 11159 | 634.7722 | -0.4 | 2 |
| 89 | 2.15E+06 | 1169.4851 | FEPAPGWYMG | 37.43 | 11162 | 585.748  | -1.0 | 2 |
| 61 | 3.32E+05 | 1113.5454 | DGHVLQLEFG | 37.54 | 11206 | 557.7786 | -0.3 | 2 |
| 69 | 5.01E+06 | 1125.48   | PQDAPYMTFG | 37.6  | 11228 | 563.7457 | -0.5 | 2 |
| 77 | 7.01E+06 | 1306.5361 | KEMEFYMSWG | 37.67 | 11250 | 654.2742 | 0.5  | 2 |
| 90 | 2.17E+07 | 1227.4985 | FYWADEFHG  | 37.68 | 11256 | 614.7547 | -0.8 | 2 |
| 86 | 2.92E+06 | 1172.5503 | KVWSFTDSFG | 37.78 | 11285 | 587.2804 | -1.3 | 2 |
| 78 | 1.58E+06 | 1003.6066 | KGLVLSLAFG | 37.79 | 11287 | 502.8086 | -1.8 | 2 |
| 76 | 1.77E+06 | 1055.4229 | DGFQMSLSDG | 37.81 | 11292 | 528.7174 | -0.3 | 2 |
| 95 | 6.74E+05 | 1393.6086 | MYFYMYKYL  | 37.99 | 11348 | 697.8099 | -0.2 | 2 |
| 97 | 1.16E+07 | 1238.637  | LTKEWVMYLG | 38.11 | 11394 | 620.3245 | 0.1  | 2 |
| 62 | 3.93E+05 | 1064.623  | LELTHVLALG | 38.3  | 11455 | 533.3171 | -1.0 | 2 |
| 63 | 7.37E+06 | 1158.498  | FQPSFQDSFG | 38.34 | 11467 | 580.2545 | -0.9 | 2 |

|    |          |           |             |       |       |          |      |   |
|----|----------|-----------|-------------|-------|-------|----------|------|---|
| 97 | 1.11E+07 | 1163.5764 | LAWGLYHTFG  | 38.37 | 11474 | 582.7933 | -1.5 | 2 |
| 95 | 1.31E+07 | 1213.5955 | WQLAKAFYMG  | 38.45 | 11498 | 607.8035 | -0.2 | 2 |
| 82 | 6.15E+06 | 1152.4724 | FSDEWGLQDG  | 38.48 | 11510 | 577.2422 | 0.1  | 2 |
| 85 | 1.32E+07 | 1208.5535 | KEPSWEMVFG  | 38.52 | 11525 | 605.2826 | -0.1 | 2 |
| 80 | 7.00E+05 | 1147.5662 | KSWVDTWGLG  | 38.53 | 11530 | 574.789  | -0.2 | 2 |
| 57 | 6.90E+05 | 1041.5352 | PVMQPALVMG  | 38.62 | 11564 | 521.7734 | -0.6 | 2 |
| 65 | 1.23E+07 | 1293.5488 | KYDGMQWYFG  | 38.63 | 11567 | 647.78   | -0.5 | 2 |
| 94 | 1.64E+07 | 1291.5808 | MQWYLTHAWG  | 38.66 | 11578 | 646.7959 | -0.6 | 2 |
| 54 | 7.37E+06 | 1158.5015 | KEMAFQDSFG  | 38.69 | 11586 | 580.2549 | -3.2 | 2 |
| 94 | 7.72E+06 | 1265.6082 | FYLTHEWTLG  | 38.91 | 11659 | 633.8096 | -0.6 | 2 |
| 91 | 2.88E+06 | 1138.5845 | KVMTWGLTFG  | 39.01 | 11693 | 570.2977 | -0.9 | 2 |
| 85 | 6.04E+06 | 1087.5007 | MVPVPTWSDG  | 39.12 | 11721 | 544.756  | -0.7 | 2 |
| 92 | 1.48E+06 | 1124.5291 | FTFGFVDVHG  | 39.32 | 11788 | 563.2704 | -0.2 | 2 |
| 85 | 9.01E+05 | 1193.6267 | KVFLVLSQMG  | 39.44 | 11826 | 597.8188 | -0.8 | 2 |
| 73 | 4.22E+06 | 1106.5032 | LQDGPSFTWG  | 40.06 | 12001 | 554.2571 | -1.0 | 2 |
| 91 | 1.34E+06 | 1179.5713 | LGLYWSFTHG  | 40.12 | 12016 | 590.7914 | -0.3 | 2 |
| 93 | 5.80E+05 | 1201.592  | PTFYWVPVHG  | 40.2  | 12036 | 601.8019 | -0.2 | 2 |
| 53 | 1.45E+06 | 1003.6066 | LVKGLSLAFG  | 40.23 | 12046 | 502.8092 | -0.5 | 2 |
| 94 | 1.15E+06 | 1139.6414 | LVLAFVKYMG  | 40.65 | 12172 | 570.8265 | -0.4 | 2 |
| 67 | 2.56E+06 | 1110.4626 | FGMAWSMQPG  | 40.67 | 12179 | 556.2386 | 2.3  | 2 |
| 77 | 1.74E+06 | 1167.4939 | MSLQPEMEFG  | 40.69 | 12186 | 584.7529 | 0.0  | 2 |
| 68 | 1.32E+07 | 1190.5244 | LQPAWEDEFG  | 40.7  | 12191 | 596.268  | -0.3 | 2 |
| 56 | 1.00E+06 | 1158.542  | FVPYLYPGMG  | 40.78 | 12218 | 580.2766 | -0.8 | 2 |
| 89 | 1.64E+06 | 1187.4958 | WVPTFGMYDG  | 40.92 | 12255 | 594.7533 | -1.0 | 2 |
| 79 | 1.58E+06 | 1046.5042 | MGLGHVMVFG  | 40.96 | 12270 | 524.2579 | -0.6 | 2 |
| 75 | 7.73E+06 | 1104.5161 | PELEPYMGLG  | 40.99 | 12280 | 553.2637 | -0.7 | 2 |
| 96 | 4.11E+03 | 1263.5781 | MVWELYHVMG  | 41.02 | 12288 | 632.794  | -1.5 | 2 |
| 64 | 4.77E+06 | 1136.5171 | LGDQLQMEFG  | 41.02 | 12290 | 569.2641 | -0.8 | 2 |
| 87 | 2.51E+06 | 1134.5347 | LTFTDAPQWG  | 41.09 | 12319 | 568.2731 | -0.5 | 2 |
| 55 | 6.50E+04 | 1284.585  | WTLEWSMYLG  | 41.21 | 12356 | 643.3029 | 7.1  | 2 |
| 95 | 6.97E+06 | 1267.5696 | WYLVHEFSMG  | 41.26 | 12368 | 634.79   | -1.0 | 2 |
| 96 | 5.12E+06 | 1257.5454 | WTFEFTHSFG  | 41.45 | 12414 | 629.7786 | -0.1 | 2 |
| 71 | 1.27E+06 | 1077.459  | WGMEFGPTPG  | 41.48 | 12425 | 539.7353 | -0.5 | 2 |
| 62 | 4.09E+06 | 1129.5479 | LTMTPEWVPG  | 41.6  | 12464 | 565.7795 | -0.7 | 2 |
| 94 | 1.24E+06 | 1243.6025 | FGLQHLYLYFG | 41.73 | 12502 | 622.8069 | -0.5 | 2 |
| 82 | 1.24E+06 | 1218.6187 | WAWSKSWVLG  | 41.81 | 12525 | 610.3143 | -1.6 | 2 |
| 73 | 2.46E+05 | 1079.4924 | PEFGLADQFG  | 41.83 | 12535 | 540.7513 | -1.9 | 2 |
| 67 | 8.82E+06 | 1065.48   | MADQLVDAFG  | 41.84 | 12537 | 533.7453 | -1.5 | 2 |
| 50 | 5.15E+05 | 1169.5393 | FQFTPEFTPG  | 41.93 | 12566 | 585.7753 | -0.6 | 2 |
| 84 | 1.57E+06 | 1348.5876 | PYWVFEHEWG  | 41.93 | 12568 | 675.2986 | -1.5 | 2 |
| 73 | 4.24E+06 | 1148.4341 | FSMYPENMG   | 41.94 | 12574 | 575.2225 | -0.9 | 2 |

|    |          |           |             |       |       |          |      |   |
|----|----------|-----------|-------------|-------|-------|----------|------|---|
| 95 | 9.41E+05 | 1098.5134 | DGWGKYFGLG  | 41.98 | 12586 | 550.2623 | -0.8 | 2 |
| 93 | 2.45E+05 | 1117.6746 | LTLVLVFEKG  | 41.98 | 12588 | 559.8427 | -1.1 | 2 |
| 61 | 8.12E+05 | 1176.4934 | DQWEDTLVDG  | 41.99 | 12594 | 589.2518 | -1.5 | 2 |
| 86 | 1.43E+07 | 1274.5642 | DEKYMYWALG  | 42.14 | 12633 | 638.288  | 0.1  | 2 |
| 53 | 5.34E+05 | 1095.4907 | LSDTMSWSLG  | 42.25 | 12661 | 548.7513 | -0.2 | 2 |
| 51 | 5.90E+05 | 1385.5862 | FQMOWQPYWG  | 42.28 | 12672 | 693.7986 | -0.4 | 2 |
| 96 | 1.54E+07 | 1317.5964 | WVWFQHVVMG  | 42.35 | 12693 | 659.8043 | 0.3  | 2 |
| 66 | 5.51E+05 | 1150.4753 | MSPTWGDVWG  | 42.48 | 12725 | 576.2435 | -0.4 | 2 |
| 66 | 5.43E+05 | 1102.4641 | DGMSFYLVLDG | 42.6  | 12759 | 552.2375 | -1.0 | 2 |
| 81 | 1.68E+06 | 1067.4561 | WTFGLSDADG  | 42.74 | 12797 | 534.7339 | -0.3 | 2 |
| 74 | 8.89E+06 | 1176.5308 | WVMQMSPELG  | 42.82 | 12820 | 589.2711 | -0.5 | 2 |
| 83 | 1.33E+07 | 1234.5547 | LYDYPTFYPG  | 43.13 | 12911 | 618.283  | -0.4 | 2 |
| 81 | 8.32E+05 | 1311.5044 | FQWEDEDTWG  | 43.28 | 12949 | 656.7582 | 0.3  | 2 |
| 93 | 3.32E+06 | 1191.5713 | LVWEFTFGHG  | 43.29 | 12952 | 596.7916 | 0.0  | 2 |
| 65 | 1.54E+06 | 1095.4907 | MTDSLWSLSLG | 43.56 | 13032 | 548.7515 | 0.2  | 2 |
| 62 | 1.12E+07 | 1099.491  | WGPAMQWAPG  | 43.6  | 13046 | 550.7516 | 0.1  | 2 |
| 63 | 4.16E+06 | 1111.4468 | FAMSWGPEMG  | 43.68 | 13062 | 556.7284 | -1.9 | 2 |
| 89 | 2.75E+05 | 1286.5654 | WQWGHVMTWG  | 43.8  | 13092 | 644.2873 | -2.0 | 2 |
| 90 | 2.55E+07 | 1159.5549 | DADVFKVFG   | 43.84 | 13101 | 580.7828 | -1.1 | 2 |
| 70 | 5.25E+05 | 1210.4963 | MGLQWEDEFG  | 44.15 | 13192 | 606.2543 | 0.3  | 2 |
| 80 | 8.57E+05 | 1315.5178 | FQFEMEQDQ   | 44.24 | 13214 | 658.7647 | 0.0  | 2 |
| 48 | 2.83E+05 | 1212.491  | DYMGPPYWG   | 44.26 | 13223 | 607.2504 | -1.6 | 2 |
| 87 | 2.74E+06 | 1242.5378 | WVMYPTFQDG  | 44.51 | 13273 | 622.2744 | -0.8 | 2 |
| 91 | 6.80E+06 | 1155.4695 | DYMGPPYWG   | 44.64 | 13301 | 578.7402 | -0.9 | 2 |
| 82 | 8.75E+06 | 1162.5447 | LSPYWSPAAG  | 44.69 | 13315 | 582.2776 | -1.3 | 2 |
| 97 | 4.35E+06 | 1269.6182 | WEWYFALAKG  | 44.7  | 13318 | 635.815  | 0.1  | 2 |
| 96 | 1.27E+06 | 1281.5852 | WEWEMVFAKG  | 44.72 | 13328 | 641.7981 | -0.6 | 2 |
| 79 | 1.27E+06 | 1263.5923 | HVLVFDYDEWG | 44.74 | 13334 | 632.8021 | 0.1  | 2 |
| 64 | 1.23E+06 | 1268.5767 | WVFGHAWYFG  | 44.9  | 13375 | 635.2943 | 0.1  | 2 |
| 77 | 1.58E+06 | 1168.5288 | PELELSDFYFG | 44.92 | 13380 | 585.2695 | -1.6 | 2 |
| 71 | 1.57E+07 | 1110.5386 | FALEPAFYPG  | 45.01 | 13402 | 556.2751 | -0.5 | 2 |
| 84 | 9.77E+06 | 1251.5559 | WTLSDQPYWG  | 45.14 | 13436 | 626.7834 | -0.6 | 2 |
| 79 | 5.78E+06 | 1134.4805 | MAPTWGDVWG  | 45.15 | 13440 | 568.2461 | -0.3 | 2 |
| 55 | 1.18E+05 | 1100.4341 | MAFVMEMADG  | 45.18 | 13445 | 551.2227 | -0.8 | 2 |
| 77 | 1.71E+06 | 1199.5168 | WYLTMTDVDG  | 45.24 | 13458 | 600.7645 | 0.2  | 2 |
| 96 | 9.59E+05 | 1305.603  | DYFYKSLQWG  | 45.26 | 13462 | 653.8073 | -0.2 | 2 |
| 88 | 4.11E+06 | 1042.4429 | FELGMGDAFG  | 45.34 | 13483 | 522.227  | -1.1 | 2 |
| 55 | 1.02E+06 | 1162.4675 | PYMTMSFVDG  | 45.56 | 13541 | 582.2394 | -0.7 | 2 |
| 79 | 7.29E+06 | 1233.5488 | LEWSPQMTWG  | 45.71 | 13604 | 617.78   | -0.5 | 2 |
| 73 | 3.42E+06 | 1187.5134 | WSDYLGLYDG  | 45.9  | 13635 | 594.7621 | -0.9 | 2 |
| 76 | 4.81E+05 | 1226.5454 | DQLELQFYDG  | 46.15 | 13684 | 614.2785 | -0.2 | 2 |



|    |          |           |            |       |       |          |      |   |
|----|----------|-----------|------------|-------|-------|----------|------|---|
| 78 | 5.65E+05 | 1234.5869 | LEWQFVLEDG | 46.25 | 13706 | 618.2975 | -3.0 | 2 |
| 57 | 2.74E+05 | 1236.5486 | WQPEFELTMG | 46.4  | 13741 | 619.2794 | -1.3 | 2 |
| 52 | 2.03E+06 | 1210.4932 | FQPGWEDEFG | 46.75 | 13817 | 606.2537 | 2.0  | 2 |
| 72 | 5.71E+06 | 1086.5532 | MGLSPQWVLG | 46.81 | 13827 | 544.2805 | -4.1 | 2 |
| 66 | 7.94E+05 | 1196.4443 | WTDGMEDTWG | 47.06 | 13873 | 599.2271 | -1.8 | 2 |
| 78 | 4.85E+06 | 1191.5559 | LQDELGFQWG | 47.08 | 13877 | 596.7833 | -1.0 | 2 |
| 74 | 2.83E+05 | 1162.4675 | MEFTMSFVDG | 47.11 | 13886 | 582.2393 | -0.9 | 2 |
| 79 | 2.64E+06 | 1184.5503 | WYLSFQDGLG | 47.25 | 13923 | 593.2806 | -0.9 | 2 |
| 86 | 2.35E+06 | 1180.5188 | WTPVFSWSDG | 47.67 | 14022 | 591.2649 | -0.8 | 2 |
| 65 | 1.03E+06 | 1153.4651 | DQFAMGWGWG | 47.72 | 14014 | 577.738  | -0.9 | 2 |
| 75 | 6.39E+06 | 1032.5645 | FVLAFVPSPG | 47.72 | 14016 | 517.2879 | -0.9 | 2 |
| 58 | 4.23E+06 | 1191.4575 | DQDSMVFYMG | 47.75 | 14026 | 596.7342 | -0.9 | 2 |
| 82 | 2.97E+05 | 1159.5762 | LVLEWEDSLG | 47.78 | 14036 | 580.795  | 1.7  | 2 |
| 80 | 9.83E+06 | 1038.5022 | LADELAFGFG | 47.83 | 14056 | 520.257  | -0.5 | 2 |
| 84 | 3.98E+06 | 1190.5471 | FYFVPAPYMG | 48.31 | 14165 | 596.2776 | -3.3 | 2 |
| 71 | 1.21E+05 | 1154.4492 | FEDAMGWGWG | 48.59 | 14223 | 578.2276 | -5.2 | 2 |
| 91 | 2.24E+06 | 1285.5479 | FYFSMQFYPG | 48.84 | 14267 | 643.7775 | -3.6 | 2 |
| 73 | 2.86E+06 | 1316.5283 | WQDGMQFYWG | 48.87 | 14273 | 659.2681 | -2.9 | 2 |
| 86 | 6.13E+06 | 1226.543  | LVMAWSDYWG | 49.23 | 14362 | 614.2772 | -0.4 | 2 |
| 61 | 9.36E+06 | 1216.6128 | WVLQPEFELG | 49.41 | 14420 | 609.3121 | -0.4 | 2 |
| 77 | 6.53E+06 | 1176.5603 | PSWAPYLTWG | 49.61 | 14448 | 589.286  | -0.2 | 2 |
| 68 | 3.68E+06 | 1135.5735 | LAMSWYPVLG | 49.66 | 14459 | 568.7906 | -3.8 | 2 |
| 76 | 2.80E+06 | 1144.6279 | FVPVWSLQLG | 49.84 | 14494 | 573.318  | -3.5 | 2 |
| 68 | 1.03E+06 | 1167.5635 | WYLVDTMALG | 49.91 | 14510 | 584.787  | -1.2 | 2 |
| 78 | 9.33E+06 | 1183.5735 | LAWAMYPLYG | 49.94 | 14517 | 592.7926 | -0.2 | 2 |
| 62 | 2.32E+06 | 1248.5564 | WQPQDVFSWG | 49.97 | 14530 | 625.2835 | -0.9 | 2 |
| 66 | 5.15E+05 | 1349.5718 | WEWYWTPEPG | 50.07 | 14558 | 675.7911 | -0.9 | 2 |
| 70 | 6.00E+06 | 1315.5696 | MYPTWQFTWG | 50.38 | 14631 | 658.7908 | 0.3  | 2 |
| 84 | 3.95E+05 | 1371.6135 | LYLEWQDYWG | 50.4  | 14635 | 686.8125 | 0.0  | 2 |
| 72 | 5.38E+05 | 1194.5378 | WQMALVFEDG | 50.67 | 14702 | 598.275  | 0.1  | 2 |
| 72 | 1.00E+06 | 1329.5852 | PQLYMSWYWG | 50.67 | 14704 | 665.7988 | 0.5  | 2 |
| 66 | 5.98E+04 | 1018.5555 | LVLSMVMGLG | 50.68 | 14707 | 510.2837 | -0.4 | 2 |
| 75 | 3.94E+05 | 1197.5706 | WSPYLSLEFG | 50.79 | 14731 | 599.791  | -0.5 | 2 |
| 68 | 1.96E+06 | 1281.5454 | FSPEWTWSWG | 50.82 | 14740 | 641.778  | -0.9 | 2 |
| 58 | 4.21E+05 | 1191.4575 | DAMQDVFYMG | 50.96 | 14773 | 596.7347 | -0.1 | 2 |
| 74 | 6.04E+05 | 1195.5405 | PALYWEMVMG | 51.04 | 14788 | 598.7762 | 0.0  | 2 |
| 72 | 4.34E+05 | 1263.4941 | MSWEFEMTFG | 51.28 | 14844 | 632.753  | 0.1  | 2 |
| 73 | 4.67E+06 | 1120.5342 | LSWTWAFGPG | 51.35 | 14862 | 561.2731 | -0.1 | 2 |
| 71 | 9.00E+05 | 1188.5815 | WVDTWVDVLG | 51.41 | 14885 | 595.2965 | -0.4 | 2 |
| 68 | 1.89E+05 | 1148.5325 | MELGWGWTLG | 51.57 | 14930 | 575.2716 | -1.1 | 2 |
| 69 | 5.15E+05 | 1229.5427 | MVDAWYFELG | 51.78 | 14963 | 615.7762 | -1.8 | 2 |

|    |          |           |            |       |       |          |      |   |
|----|----------|-----------|------------|-------|-------|----------|------|---|
| 57 | 6.53E+05 | 1281.5454 | WEPSFTWSWG | 51.91 | 14990 | 641.7784 | -0.3 | 2 |
| 65 | 7.67E+05 | 1239.4873 | FYDGDYFAWG | 51.94 | 14995 | 620.7493 | -0.4 | 2 |
| 71 | 8.07E+06 | 1146.5498 | FEWGWPVLG  | 52.46 | 15102 | 574.2787 | -3.8 | 2 |
| 89 | 3.76E+06 | 1171.4822 | DEWYLGDAFG | 52.91 | 15201 | 586.7449 | -3.8 | 2 |
| 62 | 4.73E+06 | 1263.5713 | WYWALEPGWG | 53.31 | 15279 | 632.7886 | -4.6 | 2 |
| 77 | 4.94E+05 | 1161.48   | DQMAFAFEFG | 53.34 | 15286 | 581.7454 | -1.0 | 2 |
| 54 | 5.58E+05 | 1260.5308 | MQWSFEMVFG | 53.44 | 15313 | 631.2714 | 0.1  | 2 |
| 76 | 7.68E+06 | 1133.5791 | DVMQLVPYLG | 53.64 | 15355 | 567.7935 | -3.6 | 2 |
| 85 | 4.51E+06 | 1174.5369 | DVFVPYFTMG | 54.27 | 15497 | 588.2734 | -1.7 | 2 |
| 68 | 2.78E+05 | 1239.6174 | LVDEWVLYFG | 54.35 | 15509 | 620.8143 | -0.5 | 2 |
| 77 | 6.37E+03 | 1167.5635 | DQMVFVLYPG | 54.42 | 15525 | 584.7877 | 0.0  | 2 |
| 69 | 9.16E+05 | 1093.5444 | DGLVFSWTLG | 55.32 | 15702 | 547.7782 | -0.2 | 2 |
| 72 | 2.85E+06 | 1174.5811 | WAPVFELOWG | 55.45 | 15732 | 588.2953 | -2.0 | 2 |
| 74 | 3.21E+05 | 1109.5029 | DGWTLVFTDG | 56.25 | 15883 | 555.757  | -0.9 | 2 |
| 72 | 1.91E+05 | 1321.592  | WAFYWAFQFG | 59.25 | 16556 | 661.8015 | -0.5 | 2 |
| 67 | 1.12E+05 | 1169.5757 | DSWALYFVLG | 60.13 | 16771 | 585.793  | -1.4 | 2 |

## Appendix II. Sequences identified from the 306 bead sample

| ALC | Area     | Mass      | Peptide    | RT    | Scan | m/z      | ppm  | z |
|-----|----------|-----------|------------|-------|------|----------|------|---|
| 74  | 1.77E+06 | 1331.6621 | KEHYWQKEKG | 15.31 | 2005 | 333.922  | -1.1 | 4 |
| 50  | 4.77E+05 | 1212.5312 | WYHAKAHEDG | 16.2  | 2120 | 405.1835 | -0.9 | 3 |
| 75  | 1.07E+06 | 1250.6772 | WQKTKTFQKG | 16.26 | 2130 | 417.8986 | -1.3 | 3 |
| 90  | 3.53E+06 | 1196.6553 | LTKYWSKSKG | 16.67 | 2194 | 399.8914 | -1   | 3 |
| 71  | 9.12E+04 | 1082.5178 | HVPTMAKQDG | 16.7  | 2201 | 542.2653 | -0.3 | 2 |
| 97  | 1.84E+06 | 1101.5356 | KYLGHGHSFG | 16.74 | 2214 | 551.774  | -0.6 | 2 |
| 89  | 9.15E+05 | 1224.5061 | DYHQHQFGHG | 16.77 | 2224 | 409.1749 | -1.3 | 3 |
| 62  | 2.34E+05 | 1150.4792 | HSPQHSDTWG | 16.8  | 2235 | 576.246  | -0.2 | 2 |
| 82  | 1.20E+05 | 1133.5037 | MSHSLQHTHG | 16.86 | 2257 | 378.8408 | -1.5 | 3 |
| 89  | 1.02E+05 | 1259.6221 | MYKEKVKYDG | 16.87 | 2260 | 420.8802 | -1.3 | 3 |
| 81  | 8.50E+04 | 1166.5542 | FGKYKEMAHG | 16.91 | 2269 | 389.8575 | -1.8 | 3 |
| 75  | 6.99E+05 | 1068.5715 | FVPEKGKAHG | 16.93 | 2282 | 357.1969 | -1.2 | 3 |
| 98  | 6.79E+05 | 1231.5115 | HEMEMAHYKG | 16.99 | 2300 | 616.7618 | -0.6 | 2 |
| 77  | 4.97E+05 | 1273.5991 | HYKVHSFYHG | 17.03 | 2318 | 425.5394 | -0.9 | 3 |
| 64  | 3.93E+05 | 1103.4739 | HSMSKEMTPG | 17.14 | 2362 | 552.7435 | -0.1 | 2 |
| 92  | 1.07E+06 | 1079.5149 | KGHSPSPQWG | 17.15 | 2366 | 540.7639 | -0.2 | 2 |
| 93  | 1.07E+07 | 1115.4312 | HQMTMGMSHG | 17.17 | 2373 | 558.7216 | -1   | 2 |
| 92  | 2.71E+06 | 1144.5513 | KTLSDYHQPG | 17.22 | 2396 | 573.2819 | -0.4 | 2 |
| 94  | 1.10E+06 | 1027.5121 | KGLTMSPTHG | 17.22 | 2398 | 514.762  | -1.3 | 2 |
| 97  | 5.65E+06 | 1088.5073 | MQFVHGKADG | 17.34 | 2450 | 545.2596 | -1.1 | 2 |
| 97  | 2.67E+07 | 1194.5854 | FGKYKEMVHG | 17.35 | 2454 | 399.201  | -2.2 | 3 |
| 90  | 1.26E+06 | 1142.4993 | DEPQHEFGKG | 17.39 | 2471 | 572.2557 | -0.8 | 2 |
| 90  | 1.16E+06 | 1212.5789 | PQWQHQPVHG | 17.44 | 2496 | 607.2954 | -0.8 | 2 |
| 78  | 8.30E+05 | 1138.5361 | MTKEKVMTDG | 17.45 | 2498 | 380.5183 | -1.4 | 3 |
| 97  | 2.73E+06 | 1134.4763 | PEHEHGLEMG | 17.5  | 2522 | 568.2446 | -0.1 | 2 |
| 73  | 1.96E+06 | 1093.5669 | PAHGLQKTWG | 17.63 | 2573 | 365.5286 | -1.4 | 3 |
| 81  | 7.12E+06 | 1173.4695 | HQPSHYMSMG | 17.75 | 2623 | 587.7413 | 0    | 2 |
| 88  | 3.29E+07 | 1158.5093 | LYPYHSDAHG | 17.79 | 2637 | 387.1762 | -0.8 | 3 |
| 87  | 8.24E+06 | 1000.4648 | DTMGKAPQPG | 18.09 | 2735 | 501.2386 | -0.9 | 2 |
| 87  | 6.45E+05 | 1245.5349 | FQHQMSFQHG | 18.12 | 2746 | 623.7739 | -0.1 | 2 |
| 58  | 6.56E+04 | 992.4828  | PAHTLGFQHG | 18.14 | 2755 | 331.8341 | -1   | 3 |
| 95  | 4.11E+06 | 1030.5195 | PVHVDTLGHG | 18.22 | 2787 | 516.2661 | -0.6 | 2 |
| 97  | 4.70E+06 | 1158.5049 | KTDGKYMVMG | 18.23 | 2789 | 580.2589 | -0.2 | 2 |
| 92  | 1.49E+06 | 1172.437  | WEDQHADTDG | 18.24 | 2796 | 587.2252 | 0.3  | 2 |
| 86  | 6.95E+06 | 1142.5278 | KTKTDEMSFG | 18.31 | 2823 | 572.2698 | -1.2 | 2 |
| 78  | 1.95E+05 | 1044.5352 | PVHVDTLAHG | 18.33 | 2829 | 349.1848 | -1   | 3 |
| 91  | 6.64E+05 | 1231.5291 | DQHVKESMG  | 18.34 | 2833 | 616.7709 | -0.1 | 2 |
| 84  | 3.94E+06 | 1146.5571 | HTHEHAFVLG | 18.45 | 2904 | 574.2849 | -0.3 | 2 |
| 95  | 1.14E+07 | 1068.4624 | HSDVFDVGHG | 18.57 | 2929 | 535.2375 | -0.6 | 2 |
| 68  | 1.42E+05 | 1017.4702 | HADGMVFGKG | 18.64 | 2957 | 509.7411 | -1.1 | 2 |
| 93  | 2.67E+06 | 1131.4954 | MAWGKQMSHG | 18.71 | 2984 | 566.754  | -0.4 | 2 |

|    |          |           |             |       |      |          |      |   |
|----|----------|-----------|-------------|-------|------|----------|------|---|
| 93 | 3.43E+07 | 966.4229  | MADGPSPVHG  | 18.77 | 3008 | 484.2179 | -0.4 | 2 |
| 70 | 5.54E+06 | 1104.4658 | HSKSWSDAMG  | 18.8  | 3020 | 553.2391 | -0.7 | 2 |
| 93 | 4.18E+06 | 1178.5542 | FAHTKYPQMG  | 19.07 | 3124 | 590.2838 | 0.2  | 2 |
| 72 | 2.65E+05 | 980.4385  | MADAPSPVHG  | 19.19 | 3172 | 491.2254 | -1   | 2 |
| 77 | 2.61E+05 | 999.4808  | LGMVHGKADG  | 19.26 | 3201 | 500.7451 | -3.7 | 2 |
| 98 | 6.28E+06 | 1094.5508 | PSLAHEKAWG  | 19.41 | 3259 | 548.2819 | -0.2 | 2 |
| 88 | 9.66E+06 | 1246.6128 | KVDQKQMQWG  | 19.43 | 3270 | 624.3128 | -0.1 | 2 |
| 97 | 3.25E+07 | 1031.4858 | HADAMVFGKG  | 19.63 | 3351 | 516.7491 | -0.9 | 2 |
| 90 | 7.98E+06 | 1164.5564 | FGWQKADEKG  | 19.68 | 3373 | 583.2842 | -0.9 | 2 |
| 66 | 2.16E+07 | 1121.5032 | MAKTMQMQPG  | 19.69 | 3377 | 561.7578 | -0.6 | 2 |
| 71 | 2.29E+05 | 1050.5344 | DAFADVKTGK  | 19.75 | 3403 | 351.1849 | -0.1 | 3 |
| 90 | 1.91E+06 | 1052.3547 | MGMGHEMGMG  | 19.88 | 3453 | 527.1837 | -0.6 | 2 |
| 52 | 2.03E+05 | 1231.5444 | HYWEKGMQPG  | 19.95 | 3485 | 616.7784 | -0.5 | 2 |
| 93 | 2.75E+06 | 1196.5728 | WSHAWTPQKG  | 19.96 | 3487 | 599.2925 | -0.6 | 2 |
| 70 | 7.06E+06 | 1087.4392 | PSMGPQHYDG  | 20.05 | 3524 | 544.726  | -0.3 | 2 |
| 94 | 6.77E+06 | 1097.6233 | KVWTPVPSKG  | 20.13 | 3556 | 549.818  | -0.4 | 2 |
| 97 | 1.92E+06 | 1093.4927 | PYDTLGDEKG  | 20.3  | 3617 | 547.7525 | -0.7 | 2 |
| 60 | 2.30E+06 | 985.4716  | KEDGDGPVLG  | 20.35 | 3637 | 493.742  | -0.9 | 2 |
| 85 | 2.63E+06 | 1050.4651 | DSLQDTKGMG  | 20.52 | 3684 | 526.2389 | -0.5 | 2 |
| 95 | 4.42E+06 | 1146.4917 | PTHAHYMSFG  | 20.61 | 3718 | 574.2516 | -1.4 | 2 |
| 88 | 2.53E+06 | 1204.6353 | HVKVHEL TWG | 20.67 | 3741 | 603.3238 | -0.5 | 2 |
| 91 | 4.79E+06 | 1185.593  | LQPTKYHG WG | 20.89 | 3827 | 593.8028 | -0.4 | 2 |
| 98 | 2.40E+07 | 1030.4177 | PSMGP AHYDG | 20.99 | 3866 | 516.2151 | -0.6 | 2 |
| 64 | 1.38E+05 | 1172.5461 | KELSDYHQPG  | 21.41 | 4001 | 587.2791 | -0.8 | 2 |
| 92 | 1.92E+06 | 1050.4805 | LTDGMAKGWG  | 21.55 | 4090 | 526.2448 | -3.8 | 2 |
| 84 | 1.88E+06 | 1265.6306 | HVHQKVF EWG | 21.51 | 4036 | 633.821  | -1.1 | 2 |
| 89 | 2.66E+06 | 1166.4373 | PEMSMEHSFG  | 21.67 | 4101 | 584.2248 | -0.6 | 2 |
| 94 | 3.55E+06 | 1233.5203 | HYDAPQFYHG  | 21.81 | 4159 | 617.7664 | -0.3 | 2 |
| 95 | 4.86E+06 | 1141.5767 | KGLSDQKYFG  | 22.01 | 4231 | 571.7948 | -0.1 | 2 |
| 51 | 2.59E+05 | 1007.478  | PGMSKTL SMG | 22.02 | 4235 | 504.7455 | -0.1 | 2 |
| 95 | 1.68E+07 | 1168.5334 | HSLYHVMEPG  | 22.08 | 4255 | 585.2729 | -0.6 | 2 |
| 94 | 3.68E+07 | 1051.5007 | LAKGMTDYPG  | 22.12 | 4270 | 526.7568 | -0.3 | 2 |
| 91 | 4.02E+06 | 1281.6541 | MYKTLQWQKG  | 22.3  | 4330 | 641.8336 | 0.2  | 2 |
| 71 | 3.28E+07 | 1053.5244 | FTHGPQPTLG  | 22.45 | 4385 | 527.7685 | -0.6 | 2 |
| 75 | 2.24E+06 | 1124.4419 | HYMGPGPYMG  | 22.53 | 4415 | 563.2272 | -0.5 | 2 |
| 90 | 1.27E+07 | 1032.491  | DQLVMADGKG  | 22.96 | 4572 | 517.2517 | -0.7 | 2 |
| 87 | 3.24E+07 | 1157.573  | HQPGWQLVHG  | 23.11 | 4631 | 579.7927 | -0.5 | 2 |
| 93 | 4.18E+07 | 1096.5188 | PSPEKAPEWG  | 23.12 | 4636 | 549.2657 | -0.5 | 2 |
| 94 | 3.13E+06 | 1107.5713 | LTFTKGFTHG  | 23.34 | 4721 | 554.792  | -0.4 | 2 |
| 97 | 2.24E+07 | 1021.4937 | PGMSKTL TMG | 23.38 | 4736 | 511.7533 | -0.3 | 2 |
| 93 | 3.80E+07 | 1219.5774 | HVWYHEPVPG  | 23.52 | 4789 | 610.7949 | -0.5 | 2 |
| 92 | 6.74E+05 | 1152.5352 | FEFQFGKGHG  | 23.58 | 4814 | 577.274  | -0.2 | 2 |
| 89 | 4.07E+06 | 1142.5508 | WEPYKGLGHG  | 23.65 | 4840 | 572.2818 | -0.2 | 2 |
| 64 | 5.73E+04 | 1042.4541 | PTFGHEMAPG  | 23.71 | 4864 | 522.2327 | -1.9 | 2 |

|    |          |           |             |       |      |          |      |   |
|----|----------|-----------|-------------|-------|------|----------|------|---|
| 88 | 3.63E+07 | 1106.5508 | HTFAPELVHG  | 24.03 | 4976 | 554.2817 | -0.4 | 2 |
| 72 | 2.60E+05 | 968.4086  | DVDEPGSPSG  | 24.14 | 5021 | 485.2108 | -0.4 | 2 |
| 70 | 1.50E+05 | 987.4872  | LVKSDADSPG  | 24.21 | 5045 | 494.7495 | -1.5 | 2 |
| 68 | 1.50E+05 | 1038.5862 | LGFGLYKGGK  | 24.33 | 5088 | 347.2016 | -1.9 | 3 |
| 64 | 2.82E+06 | 1158.5571 | HQWGPELVHG  | 24.4  | 5112 | 580.284  | -1.9 | 2 |
| 69 | 4.73E+05 | 1068.5239 | LVDTQPQWPG  | 24.48 | 5138 | 535.2681 | -0.8 | 2 |
| 95 | 8.22E+06 | 1166.6335 | PEKGLYKYL   | 24.49 | 5143 | 584.3231 | -0.4 | 2 |
| 87 | 5.94E+05 | 1079.54   | DGKTKAWAFG  | 24.61 | 5185 | 540.7765 | -0.2 | 2 |
| 95 | 3.61E+06 | 1078.4753 | FVHSLSMSDG  | 24.86 | 5285 | 540.2441 | -0.3 | 2 |
| 83 | 5.42E+07 | 1016.5291 | FQPGLGKVDG  | 24.89 | 5297 | 509.2711 | -0.1 | 2 |
| 54 | 2.67E+06 | 1089.4106 | MEMGPEDQPG  | 24.93 | 5310 | 545.7115 | -0.6 | 2 |
| 61 | 1.36E+05 | 1050.3755 | MGMAMHEMGM  | 25.13 | 5392 | 526.1942 | -0.4 | 2 |
| 72 | 2.93E+06 | 1148.4443 | HEPSMEDTFG  | 25.19 | 5412 | 575.2285 | -0.4 | 2 |
| 95 | 1.30E+07 | 1119.5383 | DVKEWAKGM   | 25.45 | 5503 | 560.7754 | -0.6 | 2 |
| 96 | 1.22E+06 | 1318.5806 | FYHSMYWTKG  | 25.58 | 5551 | 660.2965 | -0.3 | 2 |
| 95 | 1.69E+07 | 1023.5059 | LTMSFGPSKG  | 25.66 | 5581 | 512.7593 | -0.6 | 2 |
| 95 | 1.11E+07 | 1201.4612 | DEHGMAHYWG  | 25.82 | 5638 | 601.7366 | -0.8 | 2 |
| 88 | 4.01E+07 | 1116.5815 | KELTPTFQPG  | 25.93 | 5674 | 559.2972 | -0.3 | 2 |
| 97 | 4.60E+07 | 1120.5222 | PVDEFQKAMG  | 26.17 | 5759 | 561.2672 | -0.8 | 2 |
| 96 | 6.74E+06 | 1173.564  | KSFGMAKYWG  | 26.39 | 5836 | 587.788  | -0.8 | 2 |
| 87 | 2.66E+06 | 1096.5552 | LVDTVPVYHG  | 26.6  | 5916 | 549.2844 | 0.4  | 2 |
| 68 | 7.42E+06 | 908.4426  | PSPVMGPAPG  | 26.67 | 5942 | 455.2275 | -1   | 2 |
| 56 | 1.76E+05 | 1048.5012 | LTDAMAKGWG  | 26.77 | 5980 | 525.2568 | -0.7 | 2 |
| 94 | 1.21E+07 | 1058.4304 | DGDVHEPSFG  | 26.78 | 5983 | 530.2218 | 0    | 2 |
| 52 | 1.74E+05 | 1231.5774 | KTHTWYPGWG  | 26.91 | 6036 | 616.7952 | 0.1  | 2 |
| 96 | 1.95E+06 | 1101.4912 | MSFEHQLGPG  | 26.96 | 6055 | 551.7517 | -0.8 | 2 |
| 97 | 4.28E+07 | 1024.4978 | FGPVHTPVDG  | 27.09 | 6107 | 513.2552 | -0.5 | 2 |
| 97 | 3.95E+07 | 1001.5579 | LALVMSPSKG  | 27.26 | 6173 | 501.7856 | -0.1 | 2 |
| 84 | 4.68E+06 | 944.4451  | LTDAPSDGLG  | 27.32 | 6196 | 473.2287 | -1   | 2 |
| 84 | 5.13E+05 | 1233.5964 | KYHQMTWALG  | 27.39 | 6221 | 617.8039 | -1.3 | 2 |
| 91 | 3.78E+07 | 1190.5278 | WVPEMTDEKG  | 27.4  | 6228 | 596.2702 | -0.4 | 2 |
| 95 | 2.42E+07 | 1032.5062 | WGMTKSLGPG  | 27.5  | 6268 | 517.2593 | -0.9 | 2 |
| 97 | 4.24E+07 | 1102.5923 | HAFQFGLVKG  | 27.54 | 6283 | 552.3027 | -0.1 | 2 |
| 81 | 4.72E+07 | 1147.4934 | WAKADADEWG  | 27.57 | 6296 | 574.7531 | -0.2 | 2 |
| 98 | 7.85E+06 | 1261.5913 | MYHVDVKQWG  | 27.58 | 6302 | 631.8021 | -0.1 | 2 |
| 98 | 3.30E+07 | 1155.5447 | PYLSDTKEFG  | 27.83 | 6404 | 578.7786 | -0.5 | 2 |
| 65 | 6.67E+05 | 1114.5627 | LGMVMVKQHG  | 27.97 | 6489 | 558.2861 | -3.2 | 2 |
| 90 | 1.98E+06 | 1258.6282 | WQFVMVKQHG  | 28.34 | 6585 | 630.3201 | -0.8 | 2 |
| 52 | 1.92E+05 | 1095.5601 | LYFAKVDSFG  | 28.63 | 6682 | 548.7864 | -0.4 | 2 |
| 98 | 4.95E+07 | 1153.5654 | LYFEKVDSFG  | 28.79 | 6743 | 577.7888 | -0.7 | 2 |
| 93 | 2.72E+06 | 1168.4683 | MGMHYHEPTFG | 28.82 | 6754 | 585.2404 | -0.5 | 2 |
| 69 | 6.89E+06 | 1153.4941 | PSHAWADQWG  | 29.22 | 6886 | 577.7532 | -0.6 | 2 |
| 62 | 2.93E+05 | 1014.4771 | DAPGHTLTFG  | 29.26 | 6901 | 508.2448 | -0.6 | 2 |
| 77 | 2.77E+06 | 1037.4487 | LGDGPQMTFG  | 29.26 | 6903 | 519.7307 | -0.5 | 2 |

|    |          |           |            |       |      |          |      |   |
|----|----------|-----------|------------|-------|------|----------|------|---|
| 86 | 1.52E+07 | 1183.5774 | KSWAPQPQWG | 29.27 | 6906 | 592.7952 | -0.1 | 2 |
| 94 | 7.37E+06 | 1151.5974 | PTFQKSLQFG | 29.32 | 6925 | 576.8053 | 0.1  | 2 |
| 73 | 2.47E+05 | 1089.48   | WSMEDVLP   | 29.38 | 6946 | 545.7465 | -0.2 | 2 |
| 96 | 2.08E+07 | 1135.5662 | FQKAWTLADG | 29.44 | 6969 | 568.7891 | -0.9 | 2 |
| 70 | 2.50E+06 | 1035.5349 | DAHVLQLSPG | 29.65 | 7054 | 518.7739 | -0.4 | 2 |
| 94 | 1.03E+06 | 1156.5256 | DTFVKQMTMG | 29.68 | 7064 | 579.269  | -0.6 | 2 |
| 82 | 3.93E+07 | 1094.6123 | LVPVPAKEWG | 29.68 | 7066 | 548.3128 | 0.2  | 2 |
| 54 | 1.53E+05 | 1178.5972 | DVLQPYPYKG | 29.94 | 7157 | 590.3048 | -0.5 | 2 |
| 59 | 5.55E+04 | 1209.48   | FADSMWYFG  | 30.01 | 7182 | 605.7427 | -6.3 | 2 |
| 94 | 2.32E+07 | 1072.4746 | LVMSPDEPG  | 30.08 | 7207 | 537.2437 | -0.4 | 2 |
| 95 | 3.76E+06 | 1366.6094 | WSHEKYFQWG | 30.15 | 7237 | 684.3108 | -0.4 | 2 |
| 93 | 2.77E+07 | 1226.6196 | LQKQPQGWG  | 30.33 | 7308 | 614.3163 | 0    | 2 |
| 76 | 3.36E+06 | 1166.5066 | FVHVDAFEMG | 30.48 | 7361 | 584.259  | -1.3 | 2 |
| 88 | 3.31E+07 | 1177.6243 | LTWVPQHQLG | 30.5  | 7368 | 589.8178 | -1.4 | 2 |
| 95 | 1.08E+06 | 1124.5901 | MTKSLTFQLG | 30.77 | 7457 | 563.3013 | -0.6 | 2 |
| 70 | 2.69E+05 | 1009.5266 | FALGKGMTLG | 30.81 | 7471 | 505.7694 | -1   | 2 |
| 96 | 1.23E+06 | 1277.5574 | MTKQWAFYMG | 31    | 7537 | 639.785  | -0.2 | 2 |
| 88 | 3.33E+05 | 1203.5923 | FQKEWAPELG | 31.02 | 7542 | 602.8023 | -0.5 | 2 |
| 88 | 1.74E+06 | 1188.6079 | FVHVLAFYHG | 31.16 | 7577 | 397.209  | -1   | 3 |
| 95 | 3.90E+07 | 1042.5083 | DVPGHTLTFG | 31.3  | 7623 | 522.2604 | -0.6 | 2 |
| 76 | 1.26E+05 | 1073.6121 | LALALEKYPG | 31.48 | 7687 | 537.8122 | -0.8 | 2 |
| 97 | 1.78E+07 | 1162.5442 | DQMOWALSKG | 31.61 | 7729 | 582.2779 | -1.2 | 2 |
| 98 | 5.35E+07 | 1139.5071 | PVDAWVHEMG | 31.76 | 7788 | 570.7596 | -0.9 | 2 |
| 79 | 4.23E+07 | 1068.5603 | DVPTKVPWAG | 31.77 | 7793 | 535.2866 | -0.2 | 2 |
| 95 | 1.22E+07 | 1023.5423 | FALGKSMTLG | 31.87 | 7832 | 512.7774 | -0.7 | 2 |
| 74 | 3.31E+07 | 1201.5403 | WSHVDYPELG | 31.89 | 7835 | 601.776  | -1.1 | 2 |
| 71 | 3.18E+06 | 1010.4015 | PYDGLSDGMG | 32.08 | 7902 | 506.2072 | -0.4 | 2 |
| 69 | 2.48E+07 | 1120.5376 | KSMVPGWYPG | 32.11 | 7914 | 561.2747 | -1.1 | 2 |
| 78 | 2.54E+07 | 998.492   | LSPALTDEPG | 32.14 | 7926 | 500.2527 | 0.1  | 2 |
| 84 | 2.96E+07 | 1112.5139 | LAPQPEWTDG | 32.22 | 7958 | 557.2637 | 0.3  | 2 |
| 98 | 5.82E+07 | 1131.6174 | LALELEKYPG | 32.27 | 7981 | 566.8151 | -0.3 | 2 |
| 83 | 1.97E+07 | 1157.6233 | WQPVFVPTKG | 32.31 | 7998 | 579.8179 | -0.4 | 2 |
| 79 | 2.81E+06 | 1147.4492 | FAFQDPTDMG | 32.38 | 8025 | 574.731  | -0.2 | 2 |
| 52 | 7.23E+04 | 1049.5393 | DAFVLSKVDG | 32.51 | 8078 | 525.7756 | -1.2 | 2 |
| 95 | 3.91E+06 | 1170.676  | LVKQWLSQLG | 32.52 | 8081 | 586.3439 | -1   | 2 |
| 92 | 3.06E+07 | 1199.5547 | FQWAPQHVMG | 32.57 | 8099 | 600.7838 | -0.1 | 2 |
| 96 | 2.98E+07 | 1227.5195 | FQDEFTHTFG | 32.81 | 8189 | 614.7659 | -0.6 | 2 |
| 88 | 1.19E+07 | 986.4379  | DVPVMGPTDG | 32.82 | 8192 | 494.2251 | -1   | 2 |
| 66 | 2.11E+07 | 1112.5535 | LTPQLQMEPG | 33.03 | 8272 | 557.2831 | -0.4 | 2 |
| 90 | 6.06E+05 | 1201.5227 | MSFTKGWSWG | 33.12 | 8302 | 601.7673 | -1   | 2 |
| 67 | 4.86E+05 | 1347.5229 | WEHSFYMEFG | 33.33 | 8380 | 674.7667 | -1.8 | 2 |
| 95 | 2.76E+06 | 1169.5869 | PTWVWEPKAG | 33.62 | 8462 | 585.7994 | -1   | 2 |
| 76 | 1.70E+06 | 1072.384  | DSMGDTPYMG | 33.88 | 8538 | 537.1987 | 0.1  | 2 |
| 94 | 4.13E+06 | 1248.5298 | DYKTDEFQFG | 34.16 | 8646 | 625.2711 | -0.4 | 2 |

|    |          |           |             |       |       |          |      |   |
|----|----------|-----------|-------------|-------|-------|----------|------|---|
| 86 | 2.44E+05 | 1454.6409 | HYWYWTWEKG  | 34.37 | 8720  | 728.3275 | 0.9  | 2 |
| 69 | 2.06E+07 | 1246.46   | HEDYDYMAFG  | 34.41 | 8731  | 624.2361 | -0.6 | 2 |
| 92 | 3.86E+06 | 1340.5647 | PQPYHYMYWG  | 34.44 | 8744  | 671.2886 | -0.3 | 2 |
| 71 | 5.09E+07 | 1231.6238 | FQKEWVPELG  | 34.45 | 8747  | 616.818  | -0.6 | 2 |
| 82 | 1.63E+07 | 1216.5037 | FYDQPTDQFG  | 34.56 | 8820  | 609.258  | -0.5 | 2 |
| 76 | 1.90E+05 | 1135.5662 | LEFTKGFTHG  | 34.57 | 8789  | 568.7895 | -0.2 | 2 |
| 93 | 3.04E+07 | 1212.5498 | MALQWGHQWG  | 34.64 | 8816  | 607.2809 | -0.8 | 2 |
| 83 | 2.35E+07 | 1062.5168 | DVWGKGMTLG  | 34.87 | 8899  | 532.2653 | 0.6  | 2 |
| 93 | 1.99E+07 | 1305.5415 | WTDEFTWQHG  | 34.94 | 8923  | 653.7769 | -0.4 | 2 |
| 77 | 2.36E+06 | 1135.4392 | HEFAMSWG DG | 35.02 | 8951  | 568.7257 | -0.8 | 2 |
| 94 | 1.36E+07 | 1190.478  | WTDGF EWGHG | 35.12 | 8987  | 596.2454 | -0.3 | 2 |
| 98 | 1.77E+06 | 1314.6067 | WSLYKQWTMG  | 35.12 | 8989  | 658.3096 | -0.3 | 2 |
| 60 | 2.55E+05 | 1204.4937 | WTDAFEWGHG  | 35.19 | 9011  | 603.2541 | 1.3  | 2 |
| 88 | 2.35E+07 | 1062.5232 | LVPADTLYDG  | 35.21 | 9017  | 532.2673 | -1.7 | 2 |
| 96 | 5.48E+06 | 1019.4382 | LTDSPGMGWG  | 35.29 | 9051  | 510.7253 | -0.8 | 2 |
| 93 | 9.11E+05 | 1228.624  | LVWVDYHQLG  | 35.32 | 9062  | 615.3184 | -0.2 | 2 |
| 70 | 1.88E+07 | 1111.4822 | PSPEDVPEWG  | 35.58 | 9154  | 556.7477 | 0.1  | 2 |
| 94 | 1.31E+07 | 1171.6238 | LQLELYHSLG  | 35.82 | 9232  | 586.819  | 1.1  | 2 |
| 90 | 2.98E+06 | 1294.6709 | PQKQLYLWYG  | 35.9  | 9251  | 648.3419 | 0.   | 2 |
| 91 | 6.17E+04 | 1077.5706 | DVFVLSKVDG  | 35.96 | 9268  | 539.7922 | 0.6  | 2 |
| 81 | 3.27E+05 | 1252.5513 | FGKTDEWQWG  | 35.99 | 9280  | 627.2815 | -1   | 2 |
| 96 | 5.98E+06 | 1175.5684 | KYPSLYMAFG  | 36.04 | 9299  | 588.79   | -1.2 | 2 |
| 95 | 1.27E+06 | 1268.6111 | WEKEMTLYLG  | 36.13 | 9327  | 635.311  | -1.5 | 2 |
| 86 | 2.29E+06 | 1207.5662 | PTWYLSFTHG  | 36.53 | 9417  | 604.789  | -0.9 | 2 |
| 90 | 4.30E+06 | 1306.5691 | WSMEKYFYPG  | 36.64 | 9443  | 654.2908 | -0.2 | 2 |
| 96 | 2.17E+06 | 1338.5305 | FADYWEHEWG  | 36.89 | 9519  | 670.2706 | -1.6 | 2 |
| 76 | 1.42E+06 | 1309.5405 | HVMYMQMQWG  | 36.91 | 9527  | 655.7763 | -0.6 | 2 |
| 95 | 2.53E+06 | 1193.5361 | WSMYLVHAMG  | 37.09 | 9576  | 597.774  | -1   | 2 |
| 78 | 1.24E+06 | 1090.4541 | PAWSPSWG MG | 37.18 | 9630  | 546.2332 | -0.8 | 2 |
| 76 | 1.06E+06 | 1214.6157 | FYMKVQFVPG  | 37.23 | 9616  | 608.3145 | 0.2  | 2 |
| 60 | 2.35E+06 | 1171.4458 | DAPYDYWADG  | 37.48 | 9680  | 586.7294 | -0.1 | 2 |
| 88 | 1.14E+07 | 1257.603  | KQWTLYDTFG  | 37.94 | 9794  | 629.8082 | 0.3  | 2 |
| 92 | 9.09E+06 | 1082.4919 | LVFTDYPGDG  | 38.13 | 9849  | 542.2521 | -0.9 | 2 |
| 91 | 1.35E+07 | 1044.5239 | DVLSFTHGLG  | 38.38 | 9914  | 523.2694 | 1.6  | 2 |
| 55 | 1.85E+06 | 1120.4683 | MQWSDAPVMG  | 38.42 | 9928  | 561.2406 | -0.1 | 2 |
| 92 | 2.51E+06 | 1097.4719 | WSFGFGHGF G | 38.43 | 9931  | 549.743  | 0.9  | 2 |
| 93 | 1.60E+05 | 1362.6245 | WTKEWELW G  | 38.59 | 9980  | 682.3182 | -0.7 | 2 |
| 94 | 1.02E+07 | 1292.6377 | WQWVKYPVMG  | 38.78 | 10043 | 647.3246 | -1.1 | 2 |
| 80 | 8.23E+06 | 1095.4907 | FQMVDTDALG  | 39.13 | 10138 | 548.7524 | 0.8  | 2 |
| 60 | 9.37E+05 | 1126.5559 | LGHTWTWGLG  | 39.29 | 10183 | 564.2841 | -0.8 | 2 |
| 73 | 5.24E+06 | 1079.4197 | WSPADGFEDG  | 39.45 | 10232 | 540.718  | 2.9  | 2 |
| 95 | 3.72E+06 | 1125.6006 | LAWVHVMTLG  | 39.48 | 10243 | 563.8063 | -0.9 | 2 |
| 81 | 2.10E+07 | 1243.5549 | KYFGFYDTFG  | 39.53 | 10269 | 622.7836 | -0.6 | 2 |
| 84 | 1.68E+07 | 1294.5618 | DTLYHQFEWG  | 39.49 | 10248 | 648.2874 | 0.1  | 2 |

|    |          |           |             |       |       |          |      |   |
|----|----------|-----------|-------------|-------|-------|----------|------|---|
| 64 | 1.07E+07 | 1209.5642 | LTHGMVWYFG  | 39.52 | 10256 | 605.7877 | -1.4 | 2 |
| 90 | 6.25E+06 | 1186.5811 | KVFWYWSFGPG | 39.63 | 10290 | 594.2966 | -0.8 | 2 |
| 50 | 1.20E+07 | 1171.6025 | LVHVDTFVWG  | 39.65 | 10294 | 586.809  | 2.1  | 2 |
| 91 | 1.25E+06 | 1199.54   | LYWGFSSHSG  | 40.15 | 10407 | 600.7758 | -1.3 | 2 |
| 80 | 2.44E+06 | 1167.4292 | MSDSDGWQWG  | 40.55 | 10501 | 584.7209 | -0.3 | 2 |
| 67 | 6.24E+05 | 1219.551  | LTFQPEDQWG  | 40.68 | 10538 | 610.7813 | -1.1 | 2 |
| 89 | 4.67E+06 | 1224.5122 | MYPQLSDEWG  | 41.01 | 10609 | 613.2629 | 0.5  | 2 |
| 90 | 1.26E+07 | 1156.5552 | DVWAKSFTFG  | 41.21 | 10658 | 579.2837 | -0.7 | 2 |
| 61 | 1.16E+05 | 1356.6501 | KTFEWQLYWG  | 41.43 | 10722 | 679.3303 | -1.7 | 2 |
| 76 | 5.53E+05 | 1106.5066 | LSLSWAMQDG  | 41.55 | 10744 | 554.2593 | -1   | 2 |
| 76 | 4.45E+05 | 1135.6311 | KELYMVLALG  | 41.74 | 10782 | 568.822  | -0.2 | 2 |
| 96 | 6.28E+05 | 1254.6438 | KYPVPVWYFG  | 41.95 | 10825 | 628.3303 | 3    | 2 |
| 74 | 1.95E+05 | 1154.5066 | LQWGFMSVDG  | 42.01 | 10847 | 578.261  | 2    | 2 |
| 71 | 8.85E+05 | 1316.5398 | HSWEWAWQMG  | 42.19 | 10888 | 659.2758 | -0.8 | 2 |
| 95 | 6.33E+05 | 1293.5488 | DYFGMQKYWG  | 42.52 | 10948 | 647.7808 | -0.1 | 2 |
| 66 | 1.45E+07 | 1203.5237 | PYPAFYDQFG  | 42.85 | 11024 | 602.7686 | 0.5  | 2 |
| 81 | 5.23E+05 | 1057.5081 | PALEWGLTDG  | 43.2  | 11104 | 529.7596 | -1.8 | 2 |
| 64 | 3.00E+05 | 1154.4856 | FSPAWAMSWG  | 43.31 | 11119 | 578.2467 | -4.5 | 2 |
| 87 | 1.06E+06 | 1247.4475 | MTWYDEMTDG  | 43.36 | 11128 | 624.7296 | -1   | 2 |
| 72 | 7.16E+06 | 1184.5503 | FQFY LAPQDG | 43.67 | 11182 | 593.2814 | -0.4 | 2 |
| 78 | 2.00E+06 | 1021.4657 | FGPSFAWPG   | 43.81 | 11210 | 511.7367 | -5.4 | 2 |
| 81 | 7.73E+06 | 1131.5601 | FVWEPTLSPG  | 44.04 | 11258 | 566.7855 | -1.9 | 2 |
| 61 | 1.47E+07 | 1082.5073 | PAFAFY PVDG | 44.86 | 11444 | 542.2597 | -1   | 2 |
| 67 | 1.40E+05 | 1039.4434 | FGWAMSDGLG  | 45    | 11472 | 520.7255 | -5.4 | 2 |
| 78 | 1.21E+07 | 1205.554  | FEMQPQWALG  | 45.03 | 11481 | 603.783  | -0.8 | 2 |
| 64 | 2.40E+05 | 1153.5325 | MQLEDTLTFG  | 45.19 | 11508 | 577.7739 | 1.9  | 2 |
| 53 | 1.27E+04 | 1210.4963 | DEFGLEMQWG  | 45.34 | 11541 | 606.2566 | 3.2  | 2 |
| 61 | 8.34E+05 | 990.5386  | LSLSFAPSLG  | 45.5  | 11568 | 496.2754 | -1.1 | 2 |
| 48 | 2.11E+05 | 1210.4998 | MTDTLEMQWG  | 45.68 | 11600 | 606.2535 | -4.7 | 2 |
| 67 | 2.79E+05 | 1149.488  | WSPADQFGWG  | 45.82 | 11620 | 575.7488 | -3   | 2 |
| 65 | 5.29E+05 | 1043.6016 | FAPQLSLVLG  | 45.91 | 11638 | 522.8069 | -0.9 | 2 |
| 65 | 2.41E+06 | 1293.5303 | PEDQWY WVDG | 46.23 | 11689 | 647.7706 | -1.5 | 2 |
| 64 | 2.15E+05 | 1100.5391 | FYLSLSLSDG  | 46.31 | 11700 | 551.2759 | -0.3 | 2 |
| 81 | 2.56E+05 | 1004.5178 | LALGDVDVFG  | 46.39 | 11714 | 503.2643 | -2.4 | 2 |
| 88 | 1.59E+05 | 1188.554  | MGWVWAFVHG  | 46.77 | 11767 | 595.2816 | -3.2 | 2 |
| 73 | 2.06E+06 | 1182.4805 | WGMAPTDYWG  | 47.03 | 11807 | 592.2463 | -0.8 | 2 |
| 69 | 2.20E+05 | 1168.4683 | WAWADTMTMG  | 47.43 | 11874 | 585.2402 | -0.7 | 2 |
| 69 | 4.77E+06 | 1160.5688 | PQWVMAPYLG  | 47.53 | 11893 | 581.2915 | 1    | 2 |
| 76 | 3.66E+05 | 1153.4751 | MEFALEDGWG  | 48.46 | 12070 | 577.7441 | 0.1  | 2 |
| 71 | 2.55E+05 | 1178.5139 | PYLTMGMYFG  | 48.69 | 12103 | 590.2628 | -1.2 | 2 |
| 73 | 1.03E+05 | 1297.5403 | WQWADYFEPG  | 48.75 | 12113 | 649.7765 | -0.1 | 2 |
| 76 | 4.00E+06 | 1318.5505 | DQWYPYLYDG  | 49.02 | 12164 | 660.2816 | -0.2 | 2 |
| 64 | 1.84E+05 | 1208.5024 | FEDAFTFEFG  | 49.71 | 12282 | 605.2559 | -3   | 2 |
| 63 | 2.02E+05 | 1249.5146 | FSMYWEMSLG  | 50.14 | 12344 | 625.7635 | -0.4 | 2 |



|    |          |           |             |       |       |          |      |   |
|----|----------|-----------|-------------|-------|-------|----------|------|---|
| 63 | 4.69E+05 | 1159.4644 | WGDTFAMEFG  | 50.19 | 12363 | 580.7386 | -0.1 | 2 |
| 64 | 1.45E+05 | 1083.5422 | PVMAKSFTFG  | 50.27 | 12388 | 542.7756 | -3.9 | 2 |
| 72 | 2.95E+06 | 1091.5288 | PGLTDYLAWG  | 50.71 | 12456 | 546.7688 | -4   | 2 |
| 88 | 5.15E+04 | 1207.5662 | LVWTFQDGWG  | 50.92 | 12498 | 604.7899 | 0.6  | 2 |
| 63 | 6.55E+05 | 1078.552  | PVPYLVMGFG  | 51.16 | 12562 | 540.2819 | -1.2 | 2 |
| 78 | 3.39E+05 | 1165.5479 | LVFVDAMEWG  | 51.37 | 12609 | 583.78   | -0.8 | 2 |
| 62 | 1.50E+05 | 1174.5403 | LTDVFMVYMG  | 51.44 | 12624 | 588.277  | 0.6  | 2 |
| 65 | 1.84E+05 | 1264.5586 | PEWTMVPYWG  | 52.03 | 12709 | 633.2855 | -0.5 | 2 |
| 84 | 2.22E+06 | 1297.5479 | FYWTPSMYFG  | 52.19 | 12733 | 649.7793 | -1.6 | 2 |
| 81 | 4.47E+06 | 1224.5239 | FEWEPAWGFG  | 52.36 | 12763 | 613.2675 | -1.6 | 2 |
| 64 | 4.73E+06 | 1234.5559 | WQPTWAFGWG  | 52.81 | 12857 | 618.2844 | 0    | 2 |
| 75 | 3.46E+05 | 1189.4717 | FGWEDEFDGF  | 53.2  | 12952 | 595.7424 | 0    | 2 |
| 80 | 4.92E+05 | 1266.5413 | MVWSLEMEWG  | 53.51 | 12999 | 634.2756 | -2.3 | 2 |
| 69 | 3.91E+03 | 1183.5549 | LEDALYWAFG  | 53.6  | 13019 | 592.7836 | -0.6 | 2 |
| 77 | 4.52E+06 | 1214.4888 | MYDVWGMWAG  | 53.89 | 13073 | 608.2473 | -5.9 | 2 |
| 70 | 3.14E+05 | 1283.5798 | MVWQWAPYFG  | 53.99 | 13088 | 642.7948 | -2.4 | 2 |
| 73 | 5.00E+05 | 1206.5232 | FSPEDYFVFG  | 54.98 | 13262 | 604.2664 | -2.9 | 2 |
| 77 | 1.50E+06 | 1143.4873 | DSLSEFGFEWG | 55.96 | 13418 | 572.7488 | -2.5 | 2 |
| 69 | 1.84E+05 | 1341.5852 | PEWQFYMVWG  | 56.2  | 13469 | 671.7985 | -0.8 | 2 |
| 76 | 2.65E+05 | 1135.4609 | DSWSFGFSFG  | 57.46 | 13658 | 568.7366 | -0.8 | 2 |
| 70 | 4.45E+05 | 1415.5823 | WYFEDEWVWG  | 57.94 | 13741 | 708.7972 | -0.4 | 2 |
| 53 | 1.65E+05 | 1201.5479 | DTMAWYFVLG  | 62.37 | 14486 | 601.7801 | -0.5 | 2 |
